# Supplementary material for: Comprehensive chemical characterization of the aerosol generated by a heated tobacco product by untargeted screening
Source: PubMed Central journal article supplement (PMC7136312; doi:10.1007/s00216-020-02502-1), 2020-02-18
Supplement: 216_2020_2502_MOESM1_ESM.pdf [file 216_2020_2502_MOESM1_ESM.pdf]

## **Analytical and Bioanalytical Chemistry**

### **Electronic Supplementary Material**

#### **Comprehensive chemical characterization of the aerosol generated by a heated tobacco product by untargeted screening**

Mark C. Bentley, Martin Almstetter, Daniel Arndt, Arno Knorr, Elyette Martin,  
Pavel Pospisil, Serge Maeder

## SAMPLE COLLECTION AND ANALYSIS

### Research Materials

The commercialized Tobacco Heating System (THS) 2.2 test items were produced at Philip Morris Manufacturing & Technology Bologna (PMMTB), Italy. The samples were stored in a climatic chamber in packs at  $22 \pm 3^\circ\text{C}$  and  $60 \pm 5\%$  relative humidity (RH) prior to conditioning and aerosol collection. The reference cigarette 3R4F was purchased from the University of Kentucky, Kentucky Tobacco Research and Development Center, and stored in a cooling chamber at  $4 \pm 3^\circ\text{C}$  with uncontrolled humidity prior to conditioning and aerosol collection.

Prior to aerosol generation, the test items were conditioned in accordance with ISO 3402 (ISO 3402 “Tobacco and tobacco products -- Atmosphere for conditioning and testing 4<sup>th</sup> edition” [International Standard], available from: <https://www.iso.org/obp/ui/#iso:std:iso:3402:ed-4:v1:en>) for a minimum of 48 h and maximum of 10 days at  $22 \pm 1^\circ\text{C}$  and  $60 \pm 3\%$  RH. All test items were conditioned in open packages.

### Aerosol Generation and Sample Collection

#### LC-HRAM-MS Analysis

The list of experimental groups defined and used for LC-HRAM-MS investigations was as follows:

#### Study Sample Groups for LC-HRAM-MS

| Description   | Smoking Regimen | Sample Trapping | Type      | Short Name |
|---------------|-----------------|-----------------|-----------|------------|
| THS 2.2       | Health Canada   | TPM             | Test      | THS        |
| 3R4F          | Health Canada   | TPM             | Reference | 3R4F       |
| Blank         | Health Canada   | TPM             | Reference | Blank      |
| THS 2.2       | Health Canada   | GVP             | Test      | THS        |
| 3R4F          | Health Canada   | GVP             | Reference | 3R4F       |
| Blank THS 2.2 | Health Canada   | GVP             | Reference | BLKT       |
| Blank 3R4F    | Health Canada   | GVP             | Reference | BLK3       |

Aerosol was generated by using a linear smoking machine and then trapped and treated as required for each of the four LC-HRAM-MS methods (RP-HESI+; RP-HESI-; RP-APCI+, and HILIC-HESI+).

Mainstream aerosols of THS2.2 and 3R4F were generated under Health Canada intense smoking conditions for samples requiring reversed phase (RP) and hydrophilic interaction (HILIC) chromatography. The particulate phase (TPM) was trapped by using a 44-mm Cambridge glass fiber filter pad, and gas-vapor phase (GVP) samples were collected downstream from the filter pad by using two consecutive micro-impingers, each containing methanol (10 mL) maintained at approximately  $-60^\circ\text{C}$  by using a dry ice–isopropanol mixture.

The room conditions for aerosol generation were maintained at  $22 \pm 2^\circ\text{C}$  and  $60 \pm 5\%$  RH.

#### Aerosol Generation for TPM Samples

| Short Name | Puff Volume (mL) | Duration (s) | Puff Interval (s) | Puff Count (n) |
|------------|------------------|--------------|-------------------|----------------|
| THS        | 55               | 2            | 30                | 12             |
| 3R4F       | 55               | 2            | 30                | 10*            |
| Blank      | 55               | 2            | 30                | 12             |

\*Smoked to a fixed butt length (35 mm), achieved in approximately 10 puffs.

#### Aerosol Generation for GVP Samples

| Short Name | Puff Volume (mL) | Duration (s) | Puff Interval (s) | Puff Count (n) |
|------------|------------------|--------------|-------------------|----------------|
| THS        | 55               | 2            | 30                | 12             |
| 3R4F       | 55               | 2            | 30                | 10*            |
| BLKT       | 55               | 2            | 30                | 12             |
| BLK3       | 55               | 2            | 30                | 10             |

\*Smoked to a fixed butt length (35 mm), achieved in approximately 10 puffs.

For characterization of TPM, each sample replicate comprised the accumulation of particulate matter from two sticks/cigarettes (items), which was then extracted from the Cambridge filter pad by using methanol (2 x 5 mL) for RP analysis or acetonitrile (2 x 5 mL) for HILIC analysis. GVP samples were trapped directly in methanol by using five items per replicate for THS and three items per replicate for 3R4F (HILIC separation was not required for GVP samples). Blank samples were generated by using the same aerosol collection configuration without test items and were processed for analysis in the same way. Internal standards were added to the extracts prior to chromatographic analysis.

#### Experimental Details for Preparation of Collected Aerosol Samples

| Short Name | Sample Type | Replicates (n) | Items Per Replicate (accumulations) | Extraction Solvent | Extraction Volume (mL) | Analysis |
|------------|-------------|----------------|-------------------------------------|--------------------|------------------------|----------|
| THS        | TPM         | 3              | 2                                   | Methanol           | 10                     | RP       |
| 3R4F       | TPM         | 3              | 2                                   | Methanol           | 10                     | RP       |
| Blank      | TPM         | 3              | -                                   | Methanol           | 10                     | RP       |
| THS        | TPM         | 3              | 2                                   | Acetonitrile       | 10                     | HILIC    |
| 3R4F       | TPM         | 3              | 2                                   | Acetonitrile       | 10                     | HILIC    |
| Blank      | TPM         | 3              | -                                   | Acetonitrile       | 10                     | HILIC    |
| THS        | GVP         | 3              | 5                                   | Methanol           | 2 x 10                 | RP       |
| 3R4F       | GVP         | 3              | 3                                   | Methanol           | 2 x 10                 | RP       |
| BLKT       | GVP         | 3              | -                                   | Methanol           | 2 x 10                 | RP       |
| BLK3       | GVP         | 3              | -                                   | Methanol           | 2 x 10                 | RP       |

## GCxGC-TOFMS Analysis

The list of experimental groups defined and used for GCxGC-TOFMS investigations was as follows:

### Study Sample Groups for GCxGC-TOFMS

| Description | Smoking Regimen | Sample Trapping | Type      | Short Name |
|-------------|-----------------|-----------------|-----------|------------|
| THS 2.2     | Health Canada   | TPM/GVP         | Test      | THS        |
| Blank_THS   | Health Canada   | TPM/GVP         | Reference | Blank_THS  |
| 3R4F        | Health Canada   | TPM/GVP         | Reference | 3R4F       |
| Blank_3R4F  | Health Canada   | TPM/GVP         | Reference | Blank_3R4F |

Aerosol was generated by using a linear smoking machine and then trapped and treated as required for each of the three GCxGC-TOFMS methods (polar, nonpolar, and volatile).

Mainstream aerosols of THS and 3R4F were generated under Health Canada smoking conditions, and TPM was trapped by using a 44-mm Cambridge glass fiber filter pad. GVP samples were collected downstream from the filter pad by using two consecutive micro-impingers containing either dichloromethane (DCM)/acetone (80:20 v/v; 10 mL) maintained at approximately -80°C or N,N-dimethylformamide (DMF; 10 mL) maintained at approximately -60°C by using a dry ice–isopropanol mixture.

The room conditions for aerosol generation were  $22 \pm 2^\circ\text{C}$  and  $60 \pm 5\%$  RH.

### Aerosol Generation for TPM/GVP Samples

| Short Name | Puff Volume (mL) | Duration (s) | Puff Interval (s) | Puff Count (n) |
|------------|------------------|--------------|-------------------|----------------|
| THSR       | 55               | 2            | 30                | 12             |
| Blank_THS  | 55               | 2            | 30                | 12             |
| 3R4F       | 55               | 2            | 30                | 10*            |
| Blank_3R4F | 55               | 2            | 30                | 12             |

\*Smoked to a fixed butt length (35 mm), achieved in approximately 10 puffs.

For characterization of TPM, each sample replicate comprised the accumulation of particulate matter from five items for THS and three items for 3R4F, which was then extracted from the Cambridge filter pad by using DCM/acetone (10 mL) for nonpolar/polar compound analysis or DMF (10 mL) for volatile compound analysis. The solvents used for extraction contained internal standards relevant for the methods being performed (non-polar or volatile methods). GVP samples were trapped directly in DCM/acetone (2 x 10 mL) or DMF (2 x 10 mL) by using five items per replicate for THS and three items per replicate for 3R4F. The solvents used for trapping contained internal standards relevant for the methods being performed. The following table lists the internal standards relevant for the individual methods, and indicates their concentration equivalence in relation to THS2.2 samples (5 accumulated items per sample).

## Internal Standards for GCxGC-TOFMS Methods

| Method    | Internal Standard                       | Conc. [ $\mu\text{g}/\text{item}$ ] |      |
|-----------|-----------------------------------------|-------------------------------------|------|
|           |                                         | GVP                                 | TPM  |
| Non-Polar | 4-Aminobiphenyl-d9                      | 4.8                                 | 2.4  |
|           | Benz(a)pyrene-d12                       | 0.4                                 | 0.2  |
|           | Decanoic-d19 acid                       | 23.3                                | 11.7 |
|           | Isophorone-d8                           | 4.4                                 | 2.2  |
|           | Isoquinoline-d7                         | 6.0                                 | 3.0  |
|           | Naphthalene-d8                          | 2.1                                 | 1.1  |
|           | Phenol-d6                               | 12.6                                | 6.3  |
|           | Styrene-d8                              | 4.8                                 | 2.4  |
| Polar     | Furfural-d4                             | 2.1                                 | 2.1  |
|           | 4-Hydroxy-4-methyl-2-pentanone-d12      | 5.1                                 | 5.1  |
|           | 5-Hydroxy-2-methyl-d3-pyridine-3,4,6-d3 | 5.7                                 | 5.7  |
|           | N-Methylnicotinamide-2,4,5,6-d4         | 4.0                                 | 4.0  |
|           | 2-Methylbutyric-d9 Acid                 | 10.1                                | 10.1 |
|           | 2-Methyl-2,4-pentane-d12-diol           | 8.0                                 | 8.0  |
|           | Pentanenitrile-d9                       | 3.1                                 | 3.1  |
|           | Phenol-d6                               | 3.7                                 | 3.7  |
|           | N-iso-Propyl-d7-acrylamide              | 2.0                                 | 2.0  |
|           | Pyridine-d5                             | 1.9                                 | 1.9  |
| Volatile  | Acetone-d6                              | 10.1                                | 5.1  |
|           | Benzene-d6                              | 10.6                                | 5.3  |
|           | 2-Butanone-d5                           | 9.9                                 | 4.9  |
|           | Butyraldehyde-d8                        | 7.9                                 | 4.0  |
|           | Cyclohexene-d10                         | 5.4                                 | 2.7  |
|           | Cyclopentane-d10                        | 4.8                                 | 2.4  |
|           | 1,2-Dichloroethane-d4                   | 9.0                                 | 4.5  |
|           | Dimethyl sulfide-d6                     | 2.6                                 | 1.3  |
|           | Ethyl acetate-d8                        | 3.7                                 | 1.8  |
|           | Furan-d4                                | 10.9                                | 5.5  |
|           | Methacrylonitrile-d5                    | 10.0                                | 5.0  |
|           | 3-Methylhexane-d16                      | 6.2                                 | 3.1  |
|           | Propylene oxide-d6                      | 8.4                                 | 4.2  |
|           | Tetrahydrofuran-d8                      | 5.5                                 | 2.7  |

DCM/acetone samples were subsequently partitioned by adding an equal volume of water. After thorough mixing, followed by centrifugation, the aqueous and organic phases were separated. Internal standards relevant for the polar method were added at this point to the aqueous phase, which was then analyzed by the polar method. The organic phase was dried by using anhydrous sodium sulfate and then submitted for analysis by the nonpolar method. Blank samples were generated by using the same aerosol collection configuration without test items and were processed for analysis in the same way.

## Experimental Details for Preparation of Collected Aerosol Samples

| Short Name | Methods        | Items Per Replicate (accumulations) | Replicates (n) | Extraction Solvent | Extraction Volume (mL) | Sample Type |
|------------|----------------|-------------------------------------|----------------|--------------------|------------------------|-------------|
| THS        | Nonpolar/Polar | 5                                   | 3              | DCM/Acetone        | 10                     | TPM         |
|            | Volatile       | 5                                   | 4              | N'N-DMF            | 10                     | TPM         |
| Blank_THS  | Nonpolar/Polar | -                                   | 3              | DCM/Acetone        | 10                     | TPM         |
|            | Volatile       | -                                   | 4              | N'N-DMF            | 10                     | TPM         |
| 3R4F       | Nonpolar/Polar | 3                                   | 3              | DCM/Acetone        | 10                     | TPM         |
|            | Volatile       | 3                                   | 4              | N'N-DMF            | 10                     | TPM         |
| Blank_3R4F | Nonpolar/Polar | -                                   | 3              | DCM/Acetone        | 10                     | TPM         |
|            | Volatile       | -                                   | 4              | N'N-DMF            | 10                     | TPM         |
| THS        | Nonpolar/Polar | 5                                   | 3              | DCM/Acetone        | 2 x 10                 | GVP         |
|            | Volatile       | 5                                   | 4              | N'N-DMF            | 2 x 10                 | GVP         |
| Blank_THS  | Nonpolar/Polar | -                                   | 3              | DCM/Acetone        | 2 x 10                 | GVP         |
|            | Volatile       | -                                   | 4              | N'N-DMF            | 2 x 10                 | GVP         |
| 3R4F       | Nonpolar/Polar | 3                                   | 3              | DCM/Acetone        | 2 x 10                 | GVP         |
|            | Volatile       | 3                                   | 4              | N'N-DMF            | 2 x 10                 | GVP         |
| Blank_3R4F | Nonpolar/Polar | -                                   | 3              | DCM/Acetone        | 2 x 10                 | GVP         |
|            | Volatile       | -                                   | 4              | N'N-DMF            | 2 x 10                 | GVP         |

## Instruments, Materials and Sample Analysis

### LC-HRAM-MS Analysis

LC-HRAM-MS systems comprised the following components:

|                   |                                                   |
|-------------------|---------------------------------------------------|
| Mass Spectrometer | Thermo Q Exactive                                 |
| Autosampler       | Thermo Accela PAL                                 |
| Column Oven       | Thermo HotDog 3000                                |
| UHPLC Pump        | Thermo Accela 1250                                |
| Column RP         | Thermo Hypersil GOLD (150 x 2.1 mm; 1.9 $\mu$ m)  |
| Column HILIC      | Thermo Accucore HILIC (150 x 2.1 mm; 2.6 $\mu$ m) |

Aliquots (200  $\mu$ L) of the extracts were diluted with methanol (700  $\mu$ L) for RP analysis or acetonitrile (700  $\mu$ L) for HILIC analysis and fortified with stable labeled internal standards prior to analysis. Isophorone-d8 was used as the internal standard for RP HESI+ and RP APCI+ methods, with an added concentration equivalent to 250  $\mu$ g/item. Decanoic acid-d19 was used as the internal standard for RP HESI-, with an added concentration equivalent to 500  $\mu$ g/item. For HILIC HESI+ analysis, myosmine-2,4,5,6-d4 was used as the internal standard, with an added concentration equivalent to 125  $\mu$ g/item. Aliquots (1.5  $\mu$ L) of the diluted extracts were injected and analyzed by LC-HRAM-MS in full-scan and data-dependent fragmentation modes for compound identification. Each diluted extract was analyzed five times (analytical replicates) in both full-scan and data-dependent fragmentation modes.

To facilitate data processing, a pool sample (mixture of all samples) was prepared for each method and, following analysis, used as a reference for data processing. These pool samples represented the entire chemical space being evaluated.

Samples were analyzed by LC-HRAM-MS by using a Thermo QExactive™ high-resolution mass spectrometer in both full-scan and data-dependent acquisition modes. In total, four different methods were applied in order to cover a wide range of substances with different ionization properties and compound classes. Samples were analyzed by RP chromatography with heated electrospray ionization (HESI) in both positive and negative modes, by atmospheric pressure chemical ionization (APCI) in positive mode, and also by HILIC chromatography with HESI positive ionization. Samples extracted and prepared by using methanol and acetonitrile were analyzed by the RP and HILIC methods, respectively.

The instrument parameters were as follows:

#### Instrument Scan Events

| Scan Event | Scan Event Details                | Detection | Fragmentation | Resolution |
|------------|-----------------------------------|-----------|---------------|------------|
| (1)        | Full scan                         | FTMS      | -             | 70000      |
| (2)        | MS/MS top 3 most intense from (1) | FTMS      | HCD           | 17500      |

#### Instrument Parameters

| Parameter                 | Setting      |
|---------------------------|--------------|
| <b>General Parameters</b> |              |
| In-Source CID [eV]        | Off (0.0 eV) |
| Default Charge State      | 1            |
| <b>Full MS</b>            |              |
| Microscans                | 1            |
| Resolution                | 70000        |
| AGC Target                | 3e6          |
| Maximum IT [ms]           | 100          |
| Scan Range [Da]           | 80–800       |
| Spectrum Data Type        | Profile      |
| <b>dd-MS<sup>2</sup></b>  |              |
| Microscans                | 1            |
| Resolution                | 17500        |
| AGC Target                | 1e5          |
| Maximum IT [ms]           | 150          |
| Loop Count                | 3            |
| TopN                      | 3            |
| Isolation Window [m/z]    | 4            |
| Scan Range [Da]           | 80–800       |
| Stepped NCE [eV]          | 25, 50, 75   |

| Parameter             | Setting |
|-----------------------|---------|
| <b>dd Settings</b>    |         |
| Underfill Ratio [%]   | 1.00    |
| Intensity Threshold   | 6.7e3   |
| Apex Trigger          | Off     |
| Dynamic Exclusion [s] | 10      |

Accurate mass measurements enabled determination of the elemental composition (proposed sum formula) of precursor ions derived from the full-scan analyses as well as the elemental composition of fragments generated by data-dependent fragmentation experiments. In combination, these data provided a high confidence for the correct proposal of compound elemental composition and identification of structural features. Semi-quantification was performed by means of response comparison with stable labeled internal standards of known concentrations.

### GCxGC-TOFMS Analysis

GCxGC-TOFMS systems comprised the following components:

|                    |                                                                                                                                                                                                                                                                               |
|--------------------|-------------------------------------------------------------------------------------------------------------------------------------------------------------------------------------------------------------------------------------------------------------------------------|
| Gas chromatograph  | Agilent 7890A or equivalent                                                                                                                                                                                                                                                   |
| Mass spectrometer  | LECO Pegasus 4D                                                                                                                                                                                                                                                               |
| Autosampler        | Agilent 7683 Series                                                                                                                                                                                                                                                           |
| Injector           | Agilent 7683B Series                                                                                                                                                                                                                                                          |
| Columns (nonpolar) | 1 <sup>st</sup> : DB-5ms, 30-m length, 0.25-mm internal diameter, 0.25- $\mu$ m thickness<br>2 <sup>nd</sup> : DB-17ht, 2.2-m length, 0.10-mm internal diameter, 0.10- $\mu$ m thickness                                                                                      |
| Columns (polar)    | Pre: SLB-IL60, 2.0-m length, 0.25-mm internal diameter, 0.20- $\mu$ m thickness<br>1 <sup>st</sup> : DB-FFAP, 30-m length, 0.25-mm internal diameter, 0.25- $\mu$ m thickness<br>2 <sup>nd</sup> : VF-624ms, 1.9-m length, 0.15-mm internal diameter, 0.84- $\mu$ m thickness |
| Columns (volatile) | 1 <sup>st</sup> : DB-624UI, 30-m length, 0.25-mm internal diameter, 1.4- $\mu$ m thickness<br>2 <sup>nd</sup> : DB-FFAP, 2.4-m length, 0.10-mm internal diameter, 0.1- $\mu$ m thickness                                                                                      |

Non-targeted screening by GCxGC-TOFMS comprised three separate analytical methods focused on nonpolar, polar, and highly volatile compounds.

### Nonpolar compound analysis:

TPM was collected by using a glass fiber filter pad and extracted with DCM/acetone (80:20 v/v; containing retention index markers and internal standards). GVP was collected separately by using the same solvent mixture. Each extract was partitioned with an equal volume of water, and the organic phase, after drying with anhydrous sodium sulfate, was submitted for GCxGC-TOFMS analysis by using the following conditions:

| Instrument        | Parameter                            | Settings                                               |                              |                |
|-------------------|--------------------------------------|--------------------------------------------------------|------------------------------|----------------|
| Injector          | injector                             | cool-on-column, track-oven mode                        |                              |                |
|                   | injection                            | on-column                                              |                              |                |
|                   | injection volume                     | 0.1 $\mu$ L                                            |                              |                |
| Gas Chromatograph | carrier gas                          | helium                                                 |                              |                |
|                   | flow                                 | 1.0 mL/min (constant flow)                             |                              |                |
|                   | column 1 (1 <sup>st</sup> dimension) | 30 m DB-5ms, 0.25 mm ID, 0.25 $\mu$ m d <sub>f</sub>   |                              |                |
|                   | column 2 (2 <sup>nd</sup> dimension) | 2.2 m DB-17ht, 0.10 mm ID, 0.10 $\mu$ m d <sub>f</sub> |                              |                |
| Gas Chromatograph | primary oven temperature program     | rate ( $^{\circ}$ C/min)                               | target temp. ( $^{\circ}$ C) | duration (min) |
|                   |                                      | initial                                                | 30.0                         | 2.0            |
|                   |                                      | 5.0                                                    | 325.0                        | 15.0           |
|                   | secondary oven temperature program   | rate ( $^{\circ}$ C/min)                               | target temp. ( $^{\circ}$ C) | duration (min) |
|                   |                                      | initial                                                | 35.0                         | 2.0            |
|                   |                                      | 5.2                                                    | 340.0                        | 14.5           |
| Transfer Line     | temperature                          | 280 $^{\circ}$ C                                       |                              |                |
| Modulator         | modulator                            | enabled                                                |                              |                |
|                   | modulator temperature program        | rate ( $^{\circ}$ C/min)                               | target temp. ( $^{\circ}$ C) | duration (min) |
| initial           |                                      | 50.0                                                   | 3.0                          |                |
|                   |                                      | 5.0                                                    | 340.0                        | 15.0           |
|                   | 2-dimension separation time          | 6 s                                                    |                              |                |
|                   | hot pulse time                       | 1.00 s                                                 |                              |                |
|                   | cool time between stages             | 2.00 s                                                 |                              |                |
| Mass Spectrometer | acquisition delay                    | 440 s                                                  |                              |                |
|                   | mass range                           | 35–700 Da                                              |                              |                |
|                   | data acquisition rate                | 200 spectra/s                                          |                              |                |
|                   | detector voltage                     | 1450–2000 V                                            |                              |                |
|                   | electron energy                      | -70 V                                                  |                              |                |
|                   | temperature ion source               | 230 $^{\circ}$ C                                       |                              |                |

### Polar compound analysis:

The remaining aqueous layer from the nonpolar sample preparation was used for analysis of polar compounds. Internal standards and retention index marker compounds were added to the aqueous extract prior to direct GC×GC-TOFMS analysis by using the following conditions:

| Instrument                         | Parameter                            | Settings                                           |                   |                |
|------------------------------------|--------------------------------------|----------------------------------------------------|-------------------|----------------|
| Injector                           | injector                             | cool-on-column, track-oven mode                    |                   |                |
|                                    | injection                            | on-column                                          |                   |                |
|                                    | injection volume                     | 0.1 µL                                             |                   |                |
| Gas Chromatograph                  | carrier gas                          | helium                                             |                   |                |
|                                    | flow                                 | 1.0 mL/min (constant flow)                         |                   |                |
|                                    | pre-column                           | 2 m SLB-IL60, 0.25 mm ID, 0.20 µm d <sub>f</sub>   |                   |                |
|                                    | column 1 (1 <sup>st</sup> dimension) | 30 m DB-FFAP, 0.25 mm ID, 0.25 µm d <sub>f</sub>   |                   |                |
|                                    | column 2 (2 <sup>nd</sup> dimension) | 1.9 m VF-624ms, 0.15 mm ID, 0.84 µm d <sub>f</sub> |                   |                |
|                                    | primary oven temperature program     | rate (°C/min)                                      | target temp. (°C) | duration (min) |
|                                    |                                      | initial                                            | 35.0              | 2.0            |
| 5.0                                |                                      | 250.0                                              | 23.0              |                |
| secondary oven temperature program | rate (°C/min)                        | target temp. (°C)                                  | duration (min)    |                |
|                                    | initial                              | 55.0                                               | 2.0               |                |
|                                    | 4.6                                  | 285.0                                              | 16.0              |                |
| Transfer Line                      | temperature                          | 280°C                                              |                   |                |
| Modulator                          | modulator                            | enabled                                            |                   |                |
|                                    | modulator temperature program        | rate (°C/min)                                      | target temp. (°C) | duration (min) |
|                                    |                                      | initial                                            | 65.0              | 2.0            |
|                                    |                                      | 5.0                                                | 300.0             | 19.0           |
|                                    | 2-dimension separation time          | 6 s                                                |                   |                |
|                                    | hot pulse time                       | 1.00 s                                             |                   |                |
| cool time between stages           | 2.00 s                               |                                                    |                   |                |
| Mass Spectrometer                  | acquisition delay                    | 450 s                                              |                   |                |
|                                    | mass range                           | 29–700 Da                                          |                   |                |
|                                    | data acquisition rate                | 200 spectra/s                                      |                   |                |
|                                    | detector voltage                     | 1450–2000 V                                        |                   |                |
|                                    | electron energy                      | -70 V                                              |                   |                |
|                                    | temperature ion source               | 230°C                                              |                   |                |

### Volatile compound analysis:

TPM was collected by using a glass fiber filter pad and extracted with DMF (containing retention index markers and internal standards). GVP was collected separately by using the same solvent mixture. Each extract was submitted for GCxGC-TOFMS analysis by using the following conditions:

| Instrument                         | Parameter                                                                                                                                                                                                                                                   | Settings                                                                                                                                                                                                                                                                                                        |
|------------------------------------|-------------------------------------------------------------------------------------------------------------------------------------------------------------------------------------------------------------------------------------------------------------|-----------------------------------------------------------------------------------------------------------------------------------------------------------------------------------------------------------------------------------------------------------------------------------------------------------------|
| Injector                           | injector                                                                                                                                                                                                                                                    | cool-on-column, track-oven mode                                                                                                                                                                                                                                                                                 |
|                                    | injection                                                                                                                                                                                                                                                   | on-column                                                                                                                                                                                                                                                                                                       |
|                                    | injection volume                                                                                                                                                                                                                                            | 0.1 µL                                                                                                                                                                                                                                                                                                          |
| Gas Chromatograph                  | carrier gas                                                                                                                                                                                                                                                 | helium                                                                                                                                                                                                                                                                                                          |
|                                    | flow                                                                                                                                                                                                                                                        | 2.2 mL/min (68 min), 1.2 mL/min (12 min) (ramped flow)                                                                                                                                                                                                                                                          |
|                                    | column 1 (1 <sup>st</sup> dimension)                                                                                                                                                                                                                        | 30 m DB-624UI, 0.25 mm ID, 1.4 µm d <sub>f</sub>                                                                                                                                                                                                                                                                |
|                                    | column 2 (2 <sup>nd</sup> dimension)                                                                                                                                                                                                                        | 2.4 m DB-FFAP, 0.10 mm ID, 0.1 µm d <sub>f</sub>                                                                                                                                                                                                                                                                |
|                                    | primary oven temperature program                                                                                                                                                                                                                            | rate (°C/min)    target temp. (°C)    duration (min)<br>initial            -20.0                    1.0<br>5.0                -5.0                    0.0<br>1.0                50.0                    0.0<br>5.0                95.0                    0.0<br>45.0               230.0                   9.0 |
| secondary oven temperature program | rate (°C/min)    target temp. (°C)    duration (min)<br>initial            0.0                    4.0<br>1.0                55.0                    0.0<br>5.0                100.0                   0.0<br>45.0               235.0                   9.0 |                                                                                                                                                                                                                                                                                                                 |
| Transfer Line                      | temperature                                                                                                                                                                                                                                                 | 250°C                                                                                                                                                                                                                                                                                                           |
| Modulator                          | modulator                                                                                                                                                                                                                                                   | enabled                                                                                                                                                                                                                                                                                                         |
|                                    | modulator temperature offset to secondary oven                                                                                                                                                                                                              | 15°C                                                                                                                                                                                                                                                                                                            |
|                                    | 2-dimension separation time                                                                                                                                                                                                                                 | 6 s                                                                                                                                                                                                                                                                                                             |
| Modulator                          | hot pulse time                                                                                                                                                                                                                                              | 1.00 s                                                                                                                                                                                                                                                                                                          |
|                                    | cool time between stages                                                                                                                                                                                                                                    | 2.00 s                                                                                                                                                                                                                                                                                                          |
| Mass spectrometer                  | acquisition delay                                                                                                                                                                                                                                           | 0 s                                                                                                                                                                                                                                                                                                             |
|                                    | mass range                                                                                                                                                                                                                                                  | 29–500 Da                                                                                                                                                                                                                                                                                                       |
|                                    | data acquisition rate                                                                                                                                                                                                                                       | 200 spectra/s                                                                                                                                                                                                                                                                                                   |
|                                    | detector voltage                                                                                                                                                                                                                                            | 1450–2000 V                                                                                                                                                                                                                                                                                                     |
|                                    | electron energy                                                                                                                                                                                                                                             | -70 V                                                                                                                                                                                                                                                                                                           |
|                                    | temperature ion source                                                                                                                                                                                                                                      | 230°C                                                                                                                                                                                                                                                                                                           |

## COMPOUNDS AND CONCENTRATION ESTIMATES – FULL LIST

**Table S1 The Most Abundant ( $\geq 100$  ng/item) Chemical Constituents Present in the Aerosol of THS2.2 and Their Corresponding Concentrations in the Smoke of the 3R4F Reference Cigarette**

| Compound Name                                               | CAS Number         | Identification Confidence | Aerosol Fraction | Conc. in THS2.2 ( $\mu\text{g}/\text{item}$ ) | Conc. in 3R4F ( $\mu\text{g}/\text{item}$ ) |
|-------------------------------------------------------------|--------------------|---------------------------|------------------|-----------------------------------------------|---------------------------------------------|
| 1-Hydroxy-2-propanone/1,2-Propenediol <sup>o</sup>          | 116-09-6/7333-03-1 | Confirmed                 | TPM              | 1135                                          | 502                                         |
| Acetic acid                                                 | 64-19-7            | Confirmed                 | TPM              | 994 <sup>oo</sup>                             | 2659                                        |
| Propylene glycol                                            | 57-55-6            | Confirmed                 | TPM              | 643                                           | 89.6                                        |
| 1-Monoacetin                                                | 106-61-6           | Confirmed                 | TPM              | 409                                           | 434                                         |
| Acetaldehyde                                                | 75-07-0            | Confirmed                 | TPM/GVP          | 313                                           | 1253                                        |
| Methanol                                                    | 67-56-1            | Confirmed                 | TPM/GVP          | 211                                           | 361                                         |
| Solanesol                                                   | 13190-97-1         | Confirmed                 | TPM              | 179                                           | 3382                                        |
| Isobutyraldehyde                                            | 78-84-2            | Confirmed                 | GVP              | 116                                           | 259                                         |
| Triacetin                                                   | 102-76-1           | Confirmed                 | TPM              | 112                                           | 194                                         |
| Palmitic acid                                               | 57-10-3            | Confirmed                 | TPM              | 105                                           | 266                                         |
| 3-(2-Hydroxymethoxy)-propane-1,2-diol                       | 14641-24-8         | Confirmed                 | TPM              | 100                                           | 267                                         |
| Cembranoid degradation products (18 compounds) <sup>#</sup> | -                  | Confirmed                 | TPM              | 93.2                                          | 193                                         |
| Isovaleraldehyde                                            | 590-86-3           | Confirmed                 | TPM/GVP          | 88.7                                          | 245                                         |
| 13,14-Dihydroretinol                                        | 115797-14-3        | Confirmed                 | TPM              | 79.1                                          | 152                                         |
| Linolenic acid                                              | 463-40-1           | Confirmed                 | TPM              | 57.9                                          | 157                                         |
| Propanal                                                    | 123-38-6           | Confirmed                 | GVP              | 57.4                                          | 386                                         |
| 2-Methylbutyraldehyde                                       | 96-17-3            | Confirmed                 | GVP              | 54.7                                          | 179                                         |
| Propanoic acid                                              | 79-09-4            | Confirmed                 | TPM              | 53.2                                          | 141                                         |
| 3-Pyridinol                                                 | 109-00-2           | Confirmed                 | TPM              | 52.8                                          | 218                                         |
| $\beta$ -Nicotyrine                                         | 487-19-4           | Confirmed                 | TPM              | 52.4                                          | 100                                         |
| Pyranone                                                    | 28564-83-2         | Confirmed                 | TPM              | 51.4                                          | 44.5                                        |
| Oleic acid                                                  | 112-80-1           | Confirmed                 | TPM              | 50.2                                          | 107                                         |
| Furfural                                                    | 98-01-1            | Confirmed                 | TPM/GVP          | 47.4                                          | 38.3                                        |
| 2-Monoacetin                                                | 100-78-7           | Confirmed                 | TPM              | 46.8                                          | 30.0                                        |
| Linoleic acid                                               | 60-33-3            | Confirmed                 | TPM              | 43.0                                          | 123                                         |
| 2-Furanmethanol                                             | 98-00-0            | Confirmed                 | TPM/GVP          | 37.5                                          | 9.47                                        |
| Acetone                                                     | 67-64-1            | Confirmed                 | GVP              | 34.7                                          | 268                                         |
| 2,3-Butanedione                                             | 431-03-8           | Confirmed                 | TPM/GVP          | 34.0                                          | 127                                         |
| Anhydro sugar derivative                                    | -                  | High                      | TPM              | 30.8                                          | 43.1                                        |
| Octadecanoic acid                                           | 57-11-4            | Confirmed                 | TPM              | 29.4                                          | 72.7                                        |
| 2-Methylfuran                                               | 534-22-5           | Confirmed                 | GVP              | 28.2                                          | 175                                         |
| Furan                                                       | 110-00-9           | Confirmed                 | GVP              | 24.3                                          | 214                                         |
| Neophytadiene                                               | 504-96-1           | Confirmed                 | TPM              | 23.8                                          | 43.0                                        |
| 1-Linolenoylglycerol                                        | 18465-99-1         | Confirmed                 | TPM              | 23.5                                          | 42.8                                        |
| 5-Hydroxymethylfurfural                                     | 67-47-0            | Confirmed                 | TPM              | 23.0                                          | 82.1                                        |
| $\alpha$ -Levantenolide                                     | 30987-48-5         | Medium                    | TPM              | 22.8                                          | 74.8                                        |
| 2-Methyl-2-propenal                                         | 78-85-3            | Confirmed                 | TPM/GVP          | 22.0                                          | 115                                         |
| Pentadecanoic acid                                          | 1002-84-2          | Confirmed                 | TPM              | 18.8                                          | 32.7                                        |

<sup>o</sup>Semi-quantified concentration represents the sum of concentrations of two tautomers, which interconvert inconsistently during analysis.

<sup>oo</sup>Concentration determined quantitatively.

<sup>#</sup>Degradation experiments with suspected precursors confirmed the compound class proposal.

(CAS, Chemical Abstracts Service; THS, tobacco heating system; TPM, total particulate matter; GVP, gas-vapor phase)

**Table S1 (continued). The Most Abundant ( $\geq 100$  ng/item) Chemical Constituents Present in the Aerosol of THS2.2 and Their Corresponding Concentrations in the Smoke of the 3R4F Reference Cigarette**

| Compound Name                                                     | CAS Number               | Identification Confidence | Aerosol Fraction | Conc. in THS2.2 ( $\mu\text{g}/\text{item}$ ) | Conc. in 3R4F ( $\mu\text{g}/\text{item}$ ) |
|-------------------------------------------------------------------|--------------------------|---------------------------|------------------|-----------------------------------------------|---------------------------------------------|
| 3-Chloro-1,2-propanediol                                          | 96-24-2                  | Confirmed                 | TPM              | 16.1                                          | 8.21                                        |
| 4,6-Dihydroxy-20-nor-2,7-cembradien-12-one                        | 119613-98-8 <sup>†</sup> | High                      | TPM              | 14.6                                          | 17.8                                        |
| 3-Methylpentanoic acid                                            | 105-43-1                 | Confirmed                 | TPM              | 14.5                                          | 12.8                                        |
| 5-Methylfurfural                                                  | 620-02-0                 | Confirmed                 | TPM/GVP          | 14.2                                          | 5.25                                        |
| 1H-Pyrrole                                                        | 109-97-7                 | Confirmed                 | TPM/GVP          | 14.0                                          | 24.8                                        |
| Phytoene                                                          | 540-04-5                 | Medium                    | TPM              | 13.8                                          | 247                                         |
| Pyridine                                                          | 110-86-1                 | Confirmed                 | TPM/GVP          | 13.7                                          | 68.4                                        |
| 6,10,14,18,22,26-Hexamethyl-5,9,13,17,21,25-heptacosahexaen-2-one | 32304-17-9 <sup>†</sup>  | Medium                    | TPM              | 13.2                                          | 75.3                                        |
| Butanoic acid                                                     | 107-92-6                 | Confirmed                 | TPM              | 12.7                                          | 22.4                                        |
| 1-Acetyloxy-2-propanone                                           | 592-20-1                 | Confirmed                 | TPM/GVP          | 12.2                                          | 9.23                                        |
| N-Octanoylnornicotine                                             | 38854-10-3               | Confirmed                 | TPM              | 12.1                                          | 100                                         |
| 5,6-Dihydropyridin-2(1H)-one                                      | 6052-73-9                | Confirmed                 | TPM              | 11.8                                          | 38.8                                        |
| Methanethiol                                                      | 74-93-1                  | Confirmed                 | GVP              | 11.7                                          | 22.9                                        |
| Chloromethane                                                     | 74-87-3                  | Confirmed                 | GVP              | 11.1                                          | 32.1                                        |
| Heptacosane                                                       | 593-49-7                 | Confirmed                 | TPM              | 10.2                                          | 8.41                                        |
| $\alpha$ -Tocopherolquinone                                       | 7559-04-8                | Confirmed                 | TPM              | 10.0                                          | 40.5                                        |
| 2-Butanone                                                        | 78-93-3                  | Confirmed                 | GVP              | 10.0                                          | 128                                         |
| 3-Hydroxy-2-butanone                                              | 513-86-0                 | Confirmed                 | TPM/GVP          | 9.43                                          | 11.2                                        |
| Arachidic acid                                                    | 506-30-9                 | Confirmed                 | TPM              | 8.91                                          | 35.8                                        |
| $\alpha$ -Cembratriene-diol                                       | 57605-80-8 <sup>†</sup>  | High                      | TPM              | 8.49                                          | 0.393                                       |
| (9Z,12Z)-18-Hydroxy-9,12-octadecadienoic acid                     | 4546-59-2                | High                      | TPM              | 8.47                                          | 21.9                                        |
| 2-Cyclopentene-1,4-dione                                          | 930-60-9                 | Confirmed                 | TPM/GVP          | 8.40                                          | 2.01                                        |
| 2-Cyclopenten-1-one                                               | 930-30-3                 | Confirmed                 | TPM/GVP          | 8.20                                          | 46.9                                        |
| 2H-Pyran-2-one, tetrahydro-5-hydroxy                              | 33691-73-5               | Confirmed                 | TPM              | 8.16                                          | 4.13                                        |
| 2-Furancarboxylic acid, 3-methyl                                  | 4412-96-8                | Confirmed                 | TPM              | 8.06                                          | 18.9                                        |
| trans-Crotonaldehyde                                              | 123-73-9                 | Confirmed                 | TPM/GVP          | 7.87                                          | 210                                         |
| 8,11-Epoxy-2,6,12-cembratrien-4-ol                                | 75281-94-6 <sup>†</sup>  | Medium                    | TPM              | 7.79                                          | 19.6                                        |
| Butanal                                                           | 123-72-8                 | Confirmed                 | GVP              | 7.79                                          | 114                                         |
| trans-Solanone                                                    | 54868-48-3               | Confirmed                 | TPM/GVP          | 7.75                                          | 12.7                                        |
| Palmitoleic acid                                                  | 373-49-9                 | Confirmed                 | TPM              | 7.46                                          | 22.0                                        |
| Isoraimonol                                                       | 82458-63-7               | High                      | TPM              | 7.42                                          | 11.4                                        |
| Scopoletin                                                        | 92-61-5                  | Confirmed                 | TPM              | 7.21                                          | 42.3                                        |
| Anatabine                                                         | 581-49-7                 | Confirmed                 | TPM              | 7.15                                          | 11.8                                        |
| Behenic acid                                                      | 112-85-6                 | Confirmed                 | TPM              | 6.57                                          | 40.1                                        |
| 2,3-Pentanedione                                                  | 600-14-6                 | Confirmed                 | GVP              | 6.43                                          | 17.0                                        |
| Hexadecanoic acid, ethyl ester                                    | 628-97-7                 | Confirmed                 | TPM              | 6.43                                          | < 0.100                                     |
| 2,5-Dimethylfuran                                                 | 625-86-5                 | Confirmed                 | GVP              | 6.38                                          | 156                                         |
| Dimethyldisulfide                                                 | 624-92-0                 | Confirmed                 | GVP              | 6.34                                          | 74.1                                        |
| 2-Methyl-3-pyridinol                                              | 1121-25-1                | Confirmed                 | TPM              | 6.23                                          | 41.0                                        |
| 5-Oxo-1-tetradecyl-3-pyrrolidinecarboxylic acid                   | 10054-22-5               | Medium                    | TPM              | 6.16                                          | 10.8                                        |
| $\alpha$ -Tocopherol                                              | 10191-41-0               | Confirmed                 | TPM              | 5.80                                          | 25.4                                        |

<sup>†</sup>CAS number corresponds to one of the isomeric forms of this compound.

**Table S1 (continued). The Most Abundant ( $\geq 100$  ng/item) Chemical Constituents Present in the Aerosol of THS2.2 and Their Corresponding Concentrations in the Smoke of the 3R4F Reference Cigarette**

| Compound Name                                                        | CAS Number               | Identification Confidence | Aerosol Fraction | Conc. in THS2.2 ( $\mu\text{g}/\text{item}$ ) | Conc. in 3R4F ( $\mu\text{g}/\text{item}$ ) |
|----------------------------------------------------------------------|--------------------------|---------------------------|------------------|-----------------------------------------------|---------------------------------------------|
| 1,2-Benzenediol                                                      | 120-80-9                 | Confirmed                 | TPM              | 5.73                                          | 56.5                                        |
| Hydroquinone                                                         | 123-31-9                 | Confirmed                 | TPM              | 5.71                                          | 80.6                                        |
| 2-Hydroxy-3-oxo-butanal                                              | 473-80-3                 | High                      | TPM/GVP          | 5.60                                          | 6.58                                        |
| Andrograpanin                                                        | 82209-74-3               | Confirmed                 | TPM              | 5.57                                          | 61.7                                        |
| N-Cyclohexylnicotinamide                                             | 10354-56-0               | Medium                    | TPM              | 5.56                                          | 48.3                                        |
| Lignoceric acid                                                      | 557-59-5                 | Confirmed                 | TPM              | 5.47                                          | 30.1                                        |
| 2(5H)-Furanone                                                       | 497-23-4                 | Confirmed                 | TPM              | 5.45                                          | 2.13                                        |
| 2-Methylbutanoic acid                                                | 116-53-0                 | Confirmed                 | TPM              | 5.28                                          | 8.08                                        |
| Isoprene                                                             | 78-79-5                  | Confirmed                 | GVP              | 5.24                                          | 49.1                                        |
| Acrolein                                                             | 107-02-8                 | Confirmed                 | GVP              | 5.20                                          | 463                                         |
| 3-Methylbutanoic acid                                                | 503-74-2                 | Confirmed                 | TPM              | 5.13                                          | 9.98                                        |
| 6-Methyl-3-pyridinol                                                 | 1121-78-4                | Confirmed                 | TPM              | 5.10                                          | 21.3                                        |
| 1,4,7,10-Cyclotetradecatetraene, 1,7,11-trimethyl-4(1-methylethenyl) | 101159-07-3              | High                      | TPM              | 4.93                                          | 11.9                                        |
| Butyrolactone                                                        | 96-48-0                  | Confirmed                 | TPM              | 4.80                                          | 1.08                                        |
| Myristic acid                                                        | 544-63-8                 | Confirmed                 | TPM              | 4.62                                          | 18.7                                        |
| Stearidonic acid                                                     | 20290-75-9               | Confirmed                 | TPM              | 4.56                                          | 21.3                                        |
| Hentriacontane                                                       | 630-04-6                 | Confirmed                 | TPM              | 4.54                                          | 20.4                                        |
| Benzene                                                              | 71-43-2                  | Confirmed                 | GVP              | 4.41                                          | 106                                         |
| Acetamide                                                            | 60-35-5                  | Confirmed                 | TPM              | 4.30                                          | 38.7                                        |
| 3-Methylpalmitic acid                                                | 42172-35-0               | Medium                    | TPM              | 4.27                                          | 11.7                                        |
| 3-Methylfuran                                                        | 930-27-8                 | Confirmed                 | GVP              | 4.26                                          | 26.2                                        |
| 2-Cyclohexen-1-one, 2,4,4-trimethyl-3-(1,3-butadienyl)               | 84696-84-4               | High                      | TPM              | 4.13                                          | 21.6                                        |
| Harmaline                                                            | 304-21-2                 | Confirmed                 | TPM              | 4.07                                          | 61.2                                        |
| N-Formylornnicotine                                                  | 3000-81-5                | Confirmed                 | TPM              | 3.91                                          | 53.6                                        |
| 1,3,5,7,11-Cembrapentaene                                            | 420793-93-7 <sup>†</sup> | High                      | TPM              | 3.89                                          | 8.60                                        |
| Heptadecanoic acid                                                   | 506-12-7                 | Confirmed                 | TPM              | 3.86                                          | 11.8                                        |
| Octacosanoic acid                                                    | 506-48-9                 | Confirmed                 | TPM              | 3.81                                          | 29.4                                        |
| Tricosanoic acid                                                     | 2433-96-7                | Confirmed                 | TPM              | 3.80                                          | 18.3                                        |
| Farnesylacetone                                                      | 762-29-8                 | Confirmed                 | TPM              | 3.80                                          | 8.82                                        |
| Toluene                                                              | 108-88-3                 | Confirmed                 | GVP              | 3.80                                          | 77.5                                        |
| Phenol                                                               | 108-95-2                 | Confirmed                 | TPM              | 3.74                                          | 22.7                                        |
| N'-Carbomethoxyanabasine                                             | 56078-09-2               | High                      | TPM              | 3.71                                          | 53.2                                        |
| Propanoic acid, 2-oxo-, methyl ester                                 | 600-22-6                 | Confirmed                 | TPM/GVP          | 3.70                                          | 19.5                                        |
| 2-Methyl-2-butene                                                    | 513-35-9                 | Confirmed                 | GVP              | 3.60                                          | 92.6                                        |
| 1-(1-Oxohexyl)-2-(3-pyridinyl)-pyrrolidine                           | 38854-09-0 <sup>†</sup>  | Confirmed                 | TPM              | 3.52                                          | 34.8                                        |
| 3-[1-(2-Furanylmethyl)-2-pyrrolidinyl]-pyridine                      | 78210-85-2 <sup>†</sup>  | Confirmed                 | TPM              | 3.52                                          | 6.31                                        |
| Retinol                                                              | 68-26-8                  | Confirmed                 | TPM              | 3.48                                          | 6.82                                        |
| Shikimic acid                                                        | 138-59-0                 | Confirmed                 | TPM              | 3.41                                          | 23.5                                        |
| 3-Hydroxypalmitic acid                                               | 2398-34-7                | Confirmed                 | TPM              | 3.38                                          | 26.9                                        |
| Sclareolide                                                          | 1216-84-8                | Confirmed                 | TPM              | 3.31                                          | 4.50                                        |
| Methylvinylketone                                                    | 78-94-4                  | Confirmed                 | GVP              | 3.28                                          | 74.6                                        |

<sup>†</sup>CAS number corresponds to one of the isomeric forms of this compound.

**Table S1 (continued). The Most Abundant ( $\geq 100$  ng/item) Chemical Constituents Present in the Aerosol of THS2.2 and Their Corresponding Concentrations in the Smoke of the 3R4F Reference Cigarette**

| Compound Name                                                   | CAS Number              | Identification Confidence | Aerosol Fraction | Conc. in THS2.2 ( $\mu\text{g}/\text{item}$ ) | Conc. in 3R4F ( $\mu\text{g}/\text{item}$ ) |
|-----------------------------------------------------------------|-------------------------|---------------------------|------------------|-----------------------------------------------|---------------------------------------------|
| 1-Hydroxy-2-butanone / 1,2-Butenediol <sup>o</sup>              | 5077-67-8/50317-11-8    | Confirmed                 | TPM              | 3.23                                          | 4.06                                        |
| 2-Methylpyrazine                                                | 109-08-0                | Confirmed                 | TPM/GVP          | 3.20                                          | 27.7                                        |
| 2-Heptadecenoic acid, (2E)-                                     | 2825-78-7               | Confirmed                 | TPM              | 3.20                                          | 11.9                                        |
| Norharman                                                       | 244-63-3                | Confirmed                 | TPM              | 3.20                                          | 43.9                                        |
| cis-4-Hydroxymethyl-2-methyl-1,3-dioxolane                      | 3674-21-3               | Confirmed                 | TPM              | 3.18                                          | < 0.100                                     |
| Nicotine                                                        | 366-18-7                | Confirmed                 | TPM              | 3.18                                          | 23.6                                        |
| 10-Nonadecenoic acid                                            | 67228-95-9              | Medium                    | TPM              | 3.16                                          | 9.78                                        |
| 2,3-Dihydrofuran                                                | 1191-99-7               | Confirmed                 | GVP              | 3.14                                          | 10.1                                        |
| Cotinine                                                        | 486-56-6                | Confirmed                 | TPM              | 3.09                                          | 34.6                                        |
| 2-Hydroxy- $\gamma$ -butyrolactone                              | 19444-84-9              | Confirmed                 | TPM              | 3.09                                          | 13.6                                        |
| Methylformate                                                   | 107-31-3                | Confirmed                 | TPM/GVP          | 3.01                                          | 11.5                                        |
| 5-(Hydroxymethyl)dihydro-2(3H)-furanone                         | 10374-51-3              | Confirmed                 | TPM              | 2.85                                          | 18.9                                        |
| 1,4:3,6-Dianhydro- $\alpha$ -D-glucopyranose                    | 4451-30-3               | Confirmed                 | TPM              | 2.85                                          | 77.6                                        |
| Acetonitrile                                                    | 75-05-8                 | Confirmed                 | GVP              | 2.85                                          | 479                                         |
| 1-(1-Oxobutyl)-2-(3-pyridinyl)-pyrrolidine                      | 69730-91-2 <sup>†</sup> | Medium                    | TPM              | 2.81                                          | 5.46                                        |
| 2-Pyrrolidinone                                                 | 616-45-5                | Confirmed                 | TPM              | 2.81                                          | 20.9                                        |
| 2-Hydroxypyridine                                               | 72762-00-6              | Confirmed                 | TPM              | 2.72                                          | 39.2                                        |
| t-Phytol                                                        | 253686-88-3             | Confirmed                 | TPM              | 2.70                                          | 3.52                                        |
| 5,8,11-Eicosatriynoic acid                                      | 13488-22-7              | Confirmed                 | TPM              | 2.70                                          | 4.63                                        |
| 3-Methoxybenzidine                                              | 3365-87-5               | High                      | TPM              | 2.67                                          | 29.9                                        |
| 4-Dodecylphenol                                                 | 104-43-8                | Medium                    | TPM              | 2.60                                          | 7.10                                        |
| 2-Methyltriacontane                                             | 1560-72-1               | High                      | TPM              | 2.56                                          | 12.8                                        |
| Pentacosanoic acid                                              | 506-38-7                | Confirmed                 | TPM              | 2.53                                          | 12.0                                        |
| 1-[4-Amino-2-methyl-5-(2-methylphenyl)-1H-pyrrol-3-yl] ethanone | 56463-76-4              | Medium                    | TPM              | 2.49                                          | 18.7                                        |
| Cerotic acid                                                    | 506-46-7                | Confirmed                 | TPM              | 2.48                                          | 14.2                                        |
| Diacetin                                                        | 102-62-5 or 25395-31-7  | Confirmed                 | TPM              | 2.47                                          | 1.69                                        |
| 1-Keto- $\alpha$ -cyperone                                      | 38043-97-9              | High                      | TPM              | 2.45                                          | 8.70                                        |
| p-Xylene                                                        | 106-42-3                | Confirmed                 | GVP              | 2.39                                          | 47.8                                        |
| 3-Methylhentriacontane                                          | 4981-99-1               | High                      | TPM              | 2.39                                          | 13.0                                        |
| 12-Isopropenyl-1,5,9-trimethyl-2,5,9-cyclotetradecatrien-1-ol   | 60026-11-1              | High                      | TPM              | 2.37                                          | 30.4                                        |
| Acrylic acid                                                    | 79-10-7                 | Confirmed                 | TPM              | 2.36                                          | 35.9                                        |
| 2-Methyl-2-cyclopenten-1-one                                    | 1120-73-6               | Confirmed                 | TPM/GVP          | 2.34                                          | 35.3                                        |
| 5-Methoxy-3-(2-pyridinylmethyl)-1H-indole                       | 101832-06-8             | High                      | TPM              | 2.33                                          | 33.2                                        |
| 2-Chloro-1,3-propanediol                                        | 497-04-1                | Confirmed                 | TPM              | 2.32                                          | 2.30                                        |
| Vernolic acid                                                   | 503-07-1                | Confirmed                 | TPM              | 2.31                                          | 14.7                                        |
| Heneicosanoic acid                                              | 2363-71-5               | Confirmed                 | TPM              | 2.30                                          | 9.85                                        |
| Myosmine                                                        | 532-12-7                | Confirmed                 | TPM              | 2.27                                          | 20.5                                        |
| Dihydro- $\alpha$ -ionone                                       | 31499-72-6              | Confirmed                 | TPM              | 2.24                                          | 2.89                                        |
| 3,4-Dimethyl-5-pentyl-2-furanundecanoic acid                    | 57818-36-7              | Medium                    | TPM              | 2.21                                          | 8.54                                        |
| 2-Hydroxytetracosanoic acid                                     | 544-57-0                | Confirmed                 | TPM              | 2.19                                          | 21.8                                        |

<sup>o</sup>Semi-quantified concentration represents the sum of concentrations of two tautomers, which interconvert inconsistently during analysis.

<sup>†</sup>CAS number corresponds to one of the isomeric forms of this compound.

**Table S1 (continued). The Most Abundant ( $\geq 100$  ng/item) Chemical Constituents Present in the Aerosol of THS2.2 and Their Corresponding Concentrations in the Smoke of the 3R4F Reference Cigarette**

| Compound Name                                                     | CAS Number              | Identification Confidence | Aerosol Fraction | Conc. in THS2.2 ( $\mu\text{g}/\text{item}$ ) | Conc. in 3R4F ( $\mu\text{g}/\text{item}$ ) |
|-------------------------------------------------------------------|-------------------------|---------------------------|------------------|-----------------------------------------------|---------------------------------------------|
| Guaiacol                                                          | 90-05-1                 | Confirmed                 | TPM/GVP          | 2.18                                          | 2.33                                        |
| N-Ethylnorcotinine                                                | 359435-41-9             | Confirmed                 | TPM              | 2.16                                          | 46.2                                        |
| Retinal                                                           | 116-31-4                | Confirmed                 | TPM              | 2.13                                          | 4.33                                        |
| 3-Oxo- $\alpha$ -ionol                                            | 896107-70-3             | Confirmed                 | TPM              | 2.11                                          | 9.64                                        |
| Stigmasterol                                                      | 83-48-7                 | Confirmed                 | TPM              | 2.08                                          | 21.9                                        |
| $\beta$ -Damascenone                                              | 23726-93-4              | Confirmed                 | TPM              | 2.08                                          | 9.25                                        |
| Phenylacetaldehyde                                                | 122-78-1                | Confirmed                 | TPM/GVP          | 2.00                                          | 0.733                                       |
| 2-Acetylfuran                                                     | 1192-62-7               | Confirmed                 | TPM/GVP          | 1.99                                          | 2.38                                        |
| 2,5-Pyrrolidinedione                                              | 123-56-8                | Confirmed                 | TPM              | 1.93                                          | 29.2                                        |
| Triacantanoic acid                                                | 506-50-3                | Confirmed                 | TPM              | 1.92                                          | 15.8                                        |
| Geranylbenzoate                                                   | 94-48-4                 | Medium                    | TPM              | 1.92                                          | 6.60                                        |
| 3-Methyl-pyridine                                                 | 108-99-6                | Confirmed                 | TPM              | 1.92                                          | 28.4                                        |
| Furaneol                                                          | 3658-77-3               | Confirmed                 | TPM              | 1.92                                          | 2.89                                        |
| 2-[2-(4-Nonylphenoxy)ethoxy]ethyldecanoate                        | -                       | Medium                    | TPM              | 1.90                                          | 6.36                                        |
| 1-Butene                                                          | 106-98-9                | Confirmed                 | GVP              | 1.89                                          | 20.3                                        |
| Pentacosane                                                       | 629-99-2                | Confirmed                 | TPM              | 1.88                                          | 1.08                                        |
| Benzaldehyde                                                      | 100-52-7                | Confirmed                 | TPM/GVP          | 1.83                                          | 4.50                                        |
| cis-2,6-Dimethyl-4-piperidinone                                   | 13200-35-6              | Confirmed                 | TPM              | 1.82                                          | 1.22                                        |
| 1-(2,3,4,9-Tetrahydro-1H- $\beta$ -carbolin-1-yl)acetone          | 69225-88-3              | High                      | TPM              | 1.80                                          | 19.1                                        |
| 3-[1-(5-Ethyl-2-furanyl)-1H-pyrrol-2-yl] pyridine                 | 78210-88-5              | Medium                    | TPM              | 1.79                                          | 32.3                                        |
| 5-Methyl-2-pyridinol                                              | 1003-68-5               | Confirmed                 | TPM              | 1.77                                          | 13.1                                        |
| Nonacosane                                                        | 630-03-5                | Confirmed                 | TPM              | 1.77                                          | 7.65                                        |
| 3-Methyldotriacontane                                             | 20129-49-1              | High                      | TPM              | 1.74                                          | 11.8                                        |
| Cholest-7-en-3-ol                                                 | 6036-58-4               | Confirmed                 | TPM              | 1.71                                          | 8.55                                        |
| (Z)-11-Eicosenoic acid                                            | 5561-99-9               | Confirmed                 | TPM              | 1.68                                          | 4.07                                        |
| 2,6-Dimethylpyrazine                                              | 108-50-9                | Confirmed                 | TPM/GVP          | 1.68                                          | 10.8                                        |
| 1,4-Naphthalenedione, 2,3-dimethyl-6-(4,8,12-trimethyl tridecyl)- | 68860-42-4 <sup>†</sup> | Medium                    | TPM              | 1.67                                          | 9.33                                        |
| 2-Vinylfuran                                                      | 1487-18-9               | Confirmed                 | GVP              | 1.62                                          | 9.86                                        |
| Campesterol                                                       | 474-62-4                | Confirmed                 | TPM              | 1.58                                          | 15.0                                        |
| cis-2-Butene                                                      | 590-18-1                | Confirmed                 | GVP              | 1.53                                          | 50.4                                        |
| 1,3-Cyclopentadiene                                               | 542-92-7                | Confirmed                 | GVP              | 1.51                                          | 82.8                                        |
| $\beta$ -Sitosterol                                               | 83-46-5                 | Confirmed                 | TPM              | 1.50                                          | 15.2                                        |
| 2-Methyl-2-butenal                                                | 497-03-0                | Confirmed                 | GVP              | 1.49                                          | 9.20                                        |
| 2,4-Dimethylcyclopent-4-ene-1,3-dione                             | 65656-90-8              | High                      | TPM/GVP          | 1.49                                          | 2.73                                        |
| 3-Methyl-nonacosane                                               | 14167-67-0              | High                      | TPM              | 1.48                                          | 6.39                                        |
| Ethyl linolenate                                                  | 1191-41-9               | Confirmed                 | TPM              | 1.43                                          | 0.357                                       |
| Ricinoleic acid                                                   | 141-22-0                | Confirmed                 | TPM              | 1.38                                          | 6.59                                        |
| 2-Methyl-3-phenyl-pyrazine                                        | 29444-53-9              | Confirmed                 | TPM              | 1.37                                          | 32.8                                        |
| Dihydrofuranone derivative                                        | -                       | High                      | TPM              | 1.37                                          | 73.5                                        |
| Acrylamide                                                        | 79-06-1                 | Confirmed                 | TPM              | 1.34                                          | 5.81                                        |
| 2-Hydroxy-4,6-dimethylnicotinonitrile                             | 769-28-8                | Medium                    | TPM              | 1.32                                          | 5.92                                        |
| Glycidol                                                          | 556-52-5                | Confirmed                 | TPM              | 1.31                                          | 0.439                                       |

<sup>†</sup>CAS number corresponds to one of the isomeric forms of this compound.

**Table S1 (continued). The Most Abundant ( $\geq 100$  ng/item) Chemical Constituents Present in the Aerosol of THS2.2 and Their Corresponding Concentrations in the Smoke of the 3R4F Reference Cigarette**

| Compound Name                                                 | CAS Number              | Identification Confidence | Aerosol Fraction | Conc. in THS2.2 ( $\mu\text{g}/\text{item}$ ) | Conc. in 3R4F ( $\mu\text{g}/\text{item}$ ) |
|---------------------------------------------------------------|-------------------------|---------------------------|------------------|-----------------------------------------------|---------------------------------------------|
| 3(2H)-Furanone, dihydro-2-methyl-                             | 3188-00-9               | Confirmed                 | TPM/GVP          | 1.30                                          | 0.561                                       |
| Nicotelline                                                   | 494-04-2                | Confirmed                 | TPM              | 1.27                                          | 29.5                                        |
| Pyridine, 3-[1-(5-propyl-2-furanyl)-1H-pyrrol-2-yl]           | 78210-89-6              | Medium                    | TPM              | 1.27                                          | 30.3                                        |
| cis-2-Pentene                                                 | 627-20-3                | Confirmed                 | GVP              | 1.26                                          | 40.0                                        |
| 2-Methyl-1-butene                                             | 563-46-2                | Confirmed                 | GVP              | 1.25                                          | 44.9                                        |
| 1-(6-Hydroxy-1-oxooctyl)-2-(3-pyridinyl)-pyrrolidine          | 77829-17-5              | Confirmed                 | TPM              | 1.24                                          | 38.7                                        |
| (9Z,12Z,15Z)-18-Hydroxy-9,12,15-octadecatrienoic acid         | 51327-73-2              | High                      | TPM              | 1.23                                          | 19.4                                        |
| 2,3'-Bipyridine                                               | 581-50-0                | Confirmed                 | TPM              | 1.23                                          | 10.5                                        |
| 5-Methylcotinine                                              | 1076198-50-9            | Confirmed                 | TPM              | 1.18                                          | 30.0                                        |
| Heneicosane                                                   | 629-94-7                | Confirmed                 | TPM              | 1.17                                          | 0.495                                       |
| cis-2-Methyl-1,3-pentadiene                                   | 1501-60-6               | Confirmed                 | GVP              | 1.17                                          | 30.5                                        |
| 4-(3-Hydroxy-2,6,6-trimethyl-1-cyclohexen-1-yl)-3-buten-2-one | 14398-34-6 <sup>†</sup> | Confirmed                 | TPM              | 1.15                                          | 4.08                                        |
| 5,6-Dimethyl-3-pyridinol                                      | 61893-00-3              | Confirmed                 | TPM              | 1.15                                          | 9.31                                        |
| Nonadecanoic acid                                             | 646-30-0                | Confirmed                 | TPM              | 1.15                                          | 3.90                                        |
| Styrene                                                       | 100-42-5                | Confirmed                 | GVP              | 1.15                                          | 22.8                                        |
| trans-2-Butene                                                | 624-64-6                | Confirmed                 | GVP              | 1.14                                          | 30.4                                        |
| Nicotine-N-oxide                                              | 2820-55-5               | Confirmed                 | TPM              | 1.14                                          | 10.8                                        |
| 1H-Pyrrole, 1-methyl-                                         | 96-54-8                 | Confirmed                 | GVP              | 1.13                                          | 0.762                                       |
| Methyl-pyroglytamate                                          | 4931-66-2               | Confirmed                 | TPM              | 1.12                                          | 12.3                                        |
| $\alpha$ -Acetylbutyrolactone                                 | 517-23-7                | Confirmed                 | TPM              | 1.11                                          | 6.17                                        |
| Hexadecanoic acid, methyl ester                               | 112-39-0                | Confirmed                 | TPM              | 1.10                                          | 5.67                                        |
| Nonacosanoic acid                                             | 4250-38-8               | Confirmed                 | TPM              | 1.07                                          | 8.85                                        |
| 6-(Heptyloxy)-3-pyridinamine                                  | 857219-70-6             | High                      | TPM              | 1.07                                          | 28.7                                        |
| 2-Methyl-3-propyl-5,6-dihydropyrazine                         | 15986-94-4              | High                      | TPM              | 1.06                                          | 4.04                                        |
| N-Formyl-anatabine                                            | 77264-87-0              | Confirmed                 | TPM              | 1.06                                          | 14.0                                        |
| 2-Hydroxy-3-methyl-2-cyclopenten-1-one                        | 80-71-7                 | Confirmed                 | TPM              | 1.06                                          | 8.33                                        |
| 2,3-Dimethyl-2-cyclopenten-1-one                              | 1121-05-7               | Confirmed                 | TPM/GVP          | 1.05                                          | 10.9                                        |
| Ethyl linoleate                                               | 544-35-4                | Confirmed                 | TPM              | 0.988                                         | 0.721                                       |
| Nonanoic acid                                                 | 112-05-0                | Confirmed                 | TPM              | 0.968                                         | 1.97                                        |
| Cyclopentanone                                                | 120-92-3                | Confirmed                 | GVP              | 0.954                                         | 23.8                                        |
| 5-Hydroxymaltol                                               | 1073-96-7               | Confirmed                 | TPM              | 0.938                                         | 0.491                                       |
| 5-Methyl-2(3H)-furanone                                       | 591-12-8                | Confirmed                 | TPM/GVP          | 0.934                                         | 2.78                                        |
| Pentane                                                       | 109-66-0                | Confirmed                 | GVP              | 0.922                                         | 36.4                                        |
| cis-13-Docosenoamide                                          | 112-84-5                | Confirmed                 | GVP              | 0.922                                         | 2.33                                        |
| 2-Methyldotriacontane                                         | 1720-11-2               | High                      | TPM              | 0.917                                         | 6.33                                        |
| 17-Hydroxylinolenic acid                                      | 143343-97-9             | Medium                    | TPM              | 0.905                                         | 4.23                                        |
| Farnesylacetic acid                                           | 6040-06-8 <sup>†</sup>  | Confirmed                 | TPM              | 0.903                                         | 4.28                                        |
| o-Toluic acid                                                 | 118-90-1                | Confirmed                 | TPM              | 0.900                                         | 14.3                                        |
| Menthol                                                       | 1490-04-6               | Confirmed                 | TPM/GVP          | 0.894                                         | 1.16                                        |
| 24-Methylidenelophenol                                        | 1176-52-9               | High                      | TPM              | 0.879                                         | 6.80                                        |
| 3-Methyl-2(1H)-pyridinone                                     | 1003-56-1               | Confirmed                 | TPM              | 0.875                                         | 7.58                                        |
| 3,22,23-Trihydroxystigmastan-6-one                            | 90524-90-6 <sup>†</sup> | High                      | TPM              | 0.875                                         | 2.67                                        |

<sup>†</sup> CAS number corresponds to one of the isomeric forms for this compound

**Table S1 (continued). The Most Abundant ( $\geq 100$  ng/item) Chemical Constituents Present in the Aerosol of THS2.2 and Their Corresponding Concentrations in the Smoke of the 3R4F Reference Cigarette**

| Compound Name                                                | CAS Number  | Identification Confidence | Aerosol Fraction | Conc. in THS2.2 ( $\mu\text{g}/\text{item}$ ) | Conc. in 3R4F ( $\mu\text{g}/\text{item}$ ) |
|--------------------------------------------------------------|-------------|---------------------------|------------------|-----------------------------------------------|---------------------------------------------|
| Heptacosanoic acid                                           | 7138-40-1   | Confirmed                 | TPM              | 0.874                                         | 5.88                                        |
| Crotonic acid                                                | 3724-65-0   | Confirmed                 | TPM              | 0.866                                         | 7.74                                        |
| trans-4-hydroxymethyl-2-methyl-1,3-dioxolane                 | 3674-22-4   | Confirmed                 | TPM              | 0.857                                         | < 0.100                                     |
| cis-4-Methyl-2-pentene                                       | 691-38-3    | Confirmed                 | GVP              | 0.855                                         | 37.8                                        |
| 3-Hydroxy- $\beta$ -damascone                                | 102488-09-5 | High                      | TPM              | 0.803                                         | 3.59                                        |
| Furancarboxylic acid, methyl ester                           | 611-13-2    | Confirmed                 | TPM/GVP          | 0.789                                         | 0.234                                       |
| 3-Furaldehyde                                                | 498-60-2    | Confirmed                 | TPM/GVP          | 0.789                                         | 6.37                                        |
| trans-3-Penten-2-one                                         | 3102-33-8   | Confirmed                 | GVP              | 0.786                                         | 15.6                                        |
| Loliolide                                                    | 38274-00-9  | Confirmed                 | TPM              | 0.782                                         | 5.44                                        |
| $\alpha$ -Cyperone                                           | 473-08-5    | Confirmed                 | TPM              | 0.782                                         | 4.35                                        |
| 3-(Furfuryloxy)-1,2-propanediol                              | 20390-21-0  | Medium                    | TPM              | 0.772                                         | 0.912                                       |
| Vitamin K1                                                   | 84-80-0     | Confirmed                 | TPM              | 0.740                                         | 4.82                                        |
| Megastigmatrienone (2 isomers)                               | 5896-02-6   | Confirmed                 | TPM              | 0.735                                         | 3.84                                        |
| Cholesterol                                                  | 57-88-5     | Confirmed                 | TPM              | 0.732                                         | 6.90                                        |
| trans-2-Pental                                               | 1576-87-0   | Confirmed                 | GVP              | 0.718                                         | 4.75                                        |
| 1,3-Butadiene                                                | 106-99-0    | Confirmed                 | GVP              | 0.716                                         | 75.4                                        |
| 3-Methyl-1-butene                                            | 563-45-1    | Confirmed                 | GVP              | 0.706                                         | 34.8                                        |
| Docosane                                                     | 629-97-0    | Confirmed                 | TPM              | 0.703                                         | 0.509                                       |
| Dotriacontane                                                | 544-85-4    | Confirmed                 | TPM              | 0.702                                         | 4.60                                        |
| 1-Methyl-1,4-cyclohexadiene                                  | 4313-57-9   | Confirmed                 | GVP              | 0.698                                         | 7.46                                        |
| 3-Methyl-2-butanone                                          | 563-80-4    | Confirmed                 | GVP              | 0.697                                         | 18.2                                        |
| 1-[4-(Dimethylamino)-2-butyne-1-yl]-5-methyl-2-pyrrolidinone | 71970-74-6  | Medium                    | TPM              | 0.686                                         | 20.7                                        |
| 4,8,13-Duvatriene-1,3-diol                                   | 7220-78-2   | Confirmed                 | TPM              | 0.685                                         | 21.8                                        |
| Limonene                                                     | 138-86-3    | Confirmed                 | GVP              | 0.684                                         | 3.49                                        |
| 3-Methyl-2-cyclopenten-1-one                                 | 2758-18-1   | Confirmed                 | TPM              | 0.670                                         | 7.14                                        |
| Thiirane                                                     | 420-12-2    | Confirmed                 | GVP              | 0.663                                         | 4.37                                        |
| Cyclo(Pro-Leu)                                               | 5654-86-4   | Confirmed                 | TPM              | 0.652                                         | 15.9                                        |
| 2-Ethylfuran                                                 | 3208-16-0   | Confirmed                 | GVP              | 0.647                                         | 13.3                                        |
| Acetone cyanohydrin                                          | 75-86-5     | Confirmed                 | GVP              | 0.647                                         | 20.2                                        |
| 2(3H)-Furanone, dihydro-5-(1-hydroxyethyl)                   | 27610-27-1  | Confirmed                 | TPM              | 0.641                                         | 0.336                                       |
| 16-Hydroxy-9-hexadecenoic acid                               | 17278-80-7  | Confirmed                 | TPM              | 0.636                                         | 27.1                                        |
| Pyrrole-2-carboxamide                                        | 4551-72-8   | Confirmed                 | TPM              | 0.624                                         | 23.9                                        |
| 5-Methyl-1,3-cyclopentadiene                                 | 96-38-8     | Confirmed                 | GVP              | 0.593                                         | 20.9                                        |
| 5-Methyl-2(5H)-furanone                                      | 591-11-7    | Confirmed                 | TPM              | 0.590                                         | 0.417                                       |
| 2-Ethylpyrazine                                              | 13925-00-3  | Confirmed                 | TPM/GVP          | 0.586                                         | 3.59                                        |
| 2,4-Dimethylfuran                                            | 3710-43-8   | Confirmed                 | GVP              | 0.584                                         | 5.97                                        |
| 2-Methyl-butanenitrile                                       | 18936-17-9  | Confirmed                 | GVP              | 0.580                                         | 45.9                                        |
| 2-Methyl-5-(prop-1-en-2-yl)-2-vinyltetrahydrofuran           | 54750-70-8  | Confirmed                 | GVP              | 0.574                                         | 0.128                                       |
| 1-Methyl-3-(1-methylethyl)-2(1H)-pyrazinone                  | 78210-68-1  | Medium                    | TPM              | 0.570                                         | 8.57                                        |
| Heptane                                                      | 142-82-5    | Confirmed                 | GVP              | 0.563                                         | 20.0                                        |
| Phytuberol                                                   | 56857-64-8  | Medium                    | TPM              | 0.562                                         | 10.2                                        |
| $\alpha$ -Amylcinnamyl alcohol                               | 101-85-9    | Confirmed                 | TPM              | 0.558                                         | 3.24                                        |

**Table S1 (continued). The Most Abundant ( $\geq 100$  ng/item) Chemical Constituents Present in the Aerosol of THS2.2 and Their Corresponding Concentrations in the Smoke of the 3R4F Reference Cigarette**

| Compound Name                                                                    | CAS Number              | Identification Confidence | Aerosol Fraction | Conc. in THS2.2 ( $\mu\text{g}/\text{item}$ ) | Conc. in 3R4F ( $\mu\text{g}/\text{item}$ ) |
|----------------------------------------------------------------------------------|-------------------------|---------------------------|------------------|-----------------------------------------------|---------------------------------------------|
| 3-Hydroxysolavetivone                                                            | 62623-88-5              | High                      | TPM              | 0.553                                         | 4.22                                        |
| trans-2-Pentene                                                                  | 646-04-8                | Confirmed                 | GVP              | 0.552                                         | 42.0                                        |
| 6-Ethyl-5,6-dihydro-2H-pyran-2-one                                               | 19895-35-3              | Confirmed                 | TPM              | 0.550                                         | 1.74                                        |
| 1-Chloro-2-propanone                                                             | 78-95-5                 | Confirmed                 | GVP              | 0.546                                         | 4.89                                        |
| Benzylalcohol                                                                    | 100-51-6                | Confirmed                 | TPM              | 0.544                                         | 0.740                                       |
| Phytone                                                                          | 502-69-2                | Confirmed                 | TPM              | 0.543                                         | 5.70                                        |
| 3-Pyridinebutanol, d-amino                                                       | 70898-36-1              | Medium                    | TPM              | 0.541                                         | 16.6                                        |
| Ethylvinylketone                                                                 | 1629-58-9               | Confirmed                 | GVP              | 0.537                                         | 7.46                                        |
| Triacotane                                                                       | 638-68-6                | Confirmed                 | TPM              | 0.535                                         | 2.80                                        |
| 1-Methyl-1,3-cyclopentadiene                                                     | 96-39-9                 | Confirmed                 | GVP              | 0.534                                         | 26.6                                        |
| 2-Methyl-heptane                                                                 | 592-27-8                | Confirmed                 | GVP              | 0.529                                         | 7.39                                        |
| Keto-ionone                                                                      | 27185-77-9              | Medium                    | TPM              | 0.526                                         | 4.44                                        |
| Solerone                                                                         | 29393-32-6              | Confirmed                 | TPM              | 0.525                                         | 1.55                                        |
| 2-Farnesyloethanol                                                               | 67858-77-9 <sup>†</sup> | High                      | TPM              | 0.522                                         | 10.8                                        |
| Pentan-2-one                                                                     | 107-87-9                | Confirmed                 | GVP              | 0.522                                         | 40.0                                        |
| Geranylinalool                                                                   | 1113-21-9               | Confirmed                 | TPM              | 0.518                                         | 1.90                                        |
| 1-Acetyloxy-2-butanone                                                           | 1575-57-1               | Confirmed                 | TPM              | 0.516                                         | 0.752                                       |
| (6E,10E,14E,18E)-2,6,10,15,19,23-Hexamethyl-1,6,10,14,18,22-tetracosahexaen-3-ol | 97232-74-1              | Medium                    | TPM              | 0.505                                         | 3.05                                        |
| 6-Methyl-5-hepten-2-one                                                          | 110-93-0                | Confirmed                 | GVP              | 0.502                                         | 0.742                                       |
| p-Menthene(Cyclohexene, 1-methyl-4-(1-methylethyl)-)                             | 1195-31-9               | Confirmed                 | GVP              | 0.492                                         | 7.73                                        |
| 1-Pentene                                                                        | 109-67-1                | Confirmed                 | GVP              | 0.491                                         | 44.7                                        |
| Phenylacetic acid                                                                | 103-82-2                | Medium                    | TPM              | 0.489                                         | 4.62                                        |
| 2,6,10,14,18-Pentamethyl-2,6,10,14,18-eicosapentaene                             | 75581-03-2 <sup>†</sup> | High                      | TPM              | 0.487                                         | 10.7                                        |
| 4-Methyl-1-pentene                                                               | 691-37-2                | Confirmed                 | GVP              | 0.487                                         | 18.0                                        |
| 2-Ethyl-3-pyridinol                                                              | 61893-02-5              | Confirmed                 | TPM              | 0.475                                         | 4.55                                        |
| Pyrrolo[1,2-a]pyrazine-1,4-dione, hexahydro-3propyl-                             | 26626-89-1 <sup>†</sup> | Confirmed                 | TPM              | 0.474                                         | 16.8                                        |
| 3-Methyl-2-butenal                                                               | 107-86-8                | Confirmed                 | GVP              | 0.470                                         | 1.74                                        |
| Propanenitrile                                                                   | 107-12-0                | Confirmed                 | GVP              | 0.465                                         | 71.1                                        |
| Dimethylsulfide                                                                  | 75-18-3                 | Confirmed                 | GVP              | 0.456                                         | 1.70                                        |
| Dihydromaltol                                                                    | 38877-21-3              | Confirmed                 | TPM              | 0.453                                         | 0.341                                       |
| 16-Hydroxy-hexadecanoic acid                                                     | 506-13-8                | Confirmed                 | TPM              | 0.447                                         | 5.72                                        |
| 3-Hydroxypropionaldehyde                                                         | 2134-29-4               | High                      | TPM              | 0.445                                         | 0.691                                       |
| 4-Methyl-2-pentanone                                                             | 108-10-1                | Confirmed                 | GVP              | 0.445                                         | 7.26                                        |
| 2-Methyloctacosane                                                               | 1560-98-1               | High                      | TPM              | 0.445                                         | 1.81                                        |
| Methylacrylate                                                                   | 96-33-3                 | Confirmed                 | GVP              | 0.438                                         | 3.53                                        |
| 3-Hexene-2,5-dione                                                               | 4436-75-3               | Confirmed                 | GVP              | 0.437                                         | 3.92                                        |
| 2-Cyclohexen-1-one                                                               | 930-68-7                | Confirmed                 | TPM/GVP          | 0.436                                         | 1.55                                        |
| 13'-Hydroxy- $\gamma$ -tocopherol                                                | 1215088-63-3            | High                      | TPM              | 0.430                                         | 1.29                                        |
| Squalene                                                                         | 111-02-4                | Confirmed                 | TPM              | 0.429                                         | 2.54                                        |
| 2-Methyl-propanoic acid                                                          | 79-31-2                 | Confirmed                 | TPM              | 0.425                                         | 2.45                                        |
| 12-Oxo-phytodienoic acid                                                         | 67204-66-4              | Medium                    | TPM              | 0.422                                         | 2.02                                        |

<sup>†</sup> CAS number corresponds to one of the isomeric forms for this compound

**Table S1 (continued). The Most Abundant ( $\geq 100$  ng/item) Chemical Constituents Present in the Aerosol of THS2.2 and Their Corresponding Concentrations in the Smoke of the 3R4F Reference Cigarette**

| Compound Name                                                         | CAS Number             | Identification Confidence | Aerosol Fraction | Conc. in THS2.2 ( $\mu\text{g}/\text{item}$ ) | Conc. in 3R4F ( $\mu\text{g}/\text{item}$ ) |
|-----------------------------------------------------------------------|------------------------|---------------------------|------------------|-----------------------------------------------|---------------------------------------------|
| [1-Methyl-3-oxo-2-pentylidene-cyclopentyl]acetic acid, (2 <i>E</i> )- | 958790-53-9            | High                      | TPM              | 0.418                                         | 3.97                                        |
| Tricosanal                                                            | 72934-02-2             | Confirmed                 | TPM              | 0.417                                         | 1.64                                        |
| Stigmasta-5,7,22,25-tetraen-3-ol                                      | 119386-11-7            | High                      | TPM              | 0.409                                         | 2.84                                        |
| Higher molecular weight derivative of Farnesylacetone (C22)           | -                      | High                      | TPM              | 0.408                                         | 2.02                                        |
| 2-Methyl-pyridine                                                     | 109-06-8               | Confirmed                 | TPM/GVP          | 0.407                                         | 14.3                                        |
| $\beta$ -Damascone                                                    | 23726-91-2             | Confirmed                 | TPM              | 0.402                                         | 1.37                                        |
| 2-Methylpentane                                                       | 107-83-5               | Confirmed                 | GVP              | 0.401                                         | 12.2                                        |
| Higher molecular weight derivative of Farnesylacetone (C26)           | -                      | High                      | TPM              | 0.401                                         | 2.38                                        |
| 2,3-Dimethylfuran                                                     | 14920-89-9             | Confirmed                 | GVP              | 0.394                                         | 4.89                                        |
| 2-Hydroxycerotic acid                                                 | 14176-13-7             | Medium                    | TPM              | 0.387                                         | 4.35                                        |
| 1-Ethyl-9H-pyrindo[3,4- $\beta$ ]indole                               | 20127-61-1             | Confirmed                 | TPM              | 0.378                                         | 12.1                                        |
| 2-Methylbutane                                                        | 78-78-4                | Confirmed                 | GVP              | 0.378                                         | 21.3                                        |
| Glutarimide                                                           | 1121-89-7              | Confirmed                 | TPM              | 0.370                                         | 8.24                                        |
| Plastoquinone 3                                                       | 1168-52-1              | High                      | TPM              | 0.365                                         | 1.00                                        |
| 3,4-Hexanedione                                                       | 4437-51-8              | Confirmed                 | GVP              | 0.362                                         | 1.39                                        |
| 2-Hydroxy-2-cyclopenten-1-one / 1,2-Cyclopentanedione <sup>o</sup>    | 10493-98-8/3008-40-0   | Confirmed                 | TPM              | 0.358                                         | 0.440                                       |
| Scoparone                                                             | 120-08-1               | Confirmed                 | TPM              | 0.357                                         | 2.25                                        |
| Cyclopentene                                                          | 142-29-0               | Confirmed                 | GVP              | 0.355                                         | 20.5                                        |
| Ethylbenzene-                                                         | 100-41-4               | Confirmed                 | GVP              | 0.354                                         | 26.8                                        |
| 2,3-Dihydro-1,4-dioxin                                                | 543-75-9               | Confirmed                 | GVP              | 0.346                                         | 2.32                                        |
| Dihydro-4-hydroxy-2(3H)-furanone                                      | 7331-52-4              | Confirmed                 | TPM              | 0.340                                         | 4.78                                        |
| Cyclohexene, 3-(2-propenyl)- or Cyclohexene, 3-(1-methylethyl)-       | 5232-95-8 or 3983-08-2 | Medium                    | GVP              | 0.333                                         | 4.95                                        |
| trans-1,3-Pentadiene                                                  | 2004-70-8              | Confirmed                 | GVP              | 0.330                                         | 64.6                                        |
| Pentan-3-one                                                          | 96-22-0                | Confirmed                 | GVP              | 0.328                                         | 14.1                                        |
| Pyrazine                                                              | 290-37-9               | Confirmed                 | TPM/GVP          | 0.318                                         | 2.04                                        |
| 2-Methyl-2-propenoic acid                                             | 79-41-4                | Confirmed                 | TPM              | 0.311                                         | 2.70                                        |
| Cyclohexylphenylacetic acid                                           | 3894-09-5              | Confirmed                 | TPM              | 0.309                                         | 3.68                                        |
| Pentanal                                                              | 110-62-3               | Confirmed                 | GVP              | 0.308                                         | 3.08                                        |
| 3-Oxo-7,8-dihydro-a-ionol                                             | 60047-19-0             | Confirmed                 | TPM              | 0.307                                         | 1.75                                        |
| 2,3-Dimethylpyrazine                                                  | 5910-89-4              | Confirmed                 | TPM/GVP          | 0.307                                         | 2.79                                        |
| Geranylacetone                                                        | 3796-70-1              | Confirmed                 | TPM              | 0.294                                         | 1.39                                        |
| 3(2H)-Furanone                                                        | 3511-31-7              | Medium                    | TPM              | 0.294                                         | < 0.100                                     |
| 2-Oxo-propionamide                                                    | 631-66-3               | Confirmed                 | TPM              | 0.291                                         | 4.95                                        |
| trans-2,6-Octadiene, 2,6-dimethyl-                                    | 2609-23-6              | Confirmed                 | GVP              | 0.288                                         | 6.93                                        |
| Glycidylacetate                                                       | 6387-89-9              | Confirmed                 | TPM              | 0.282                                         | 0.211                                       |
| Cyclo(Phe-Pro)                                                        | 3705-26-8              | Confirmed                 | TPM              | 0.280                                         | 10.3                                        |
| Harman                                                                | 486-84-0               | Confirmed                 | TPM              | 0.278                                         | 25.5                                        |
| 6,10,14,18-Tetramethyl-5,9,13,17-nonadecatetraen-2-one                | 6809-52-5              | Confirmed                 | TPM              | 0.278                                         | 0.902                                       |
| Squalene derivative (C28)                                             | -                      | Medium                    | TPM              | 0.277                                         | 7.55                                        |
| Norsolanadione                                                        | 60619-46-7             | High                      | TPM              | 0.275                                         | 3.14                                        |
| 2-Cyclopenten-1-one, dimethyl- (configurational isomer 1)             | -                      | High                      | TPM/GVP          | 0.273                                         | 8.16                                        |

<sup>o</sup> semi-quantified concentration represents the sum of 2 tautomers, which interconvert inconsistently during analysis

**Table S1 (continued). The Most Abundant ( $\geq 100$  ng/item) Chemical Constituents Present in the Aerosol of THS2.2 and Their Corresponding Concentrations in the Smoke of the 3R4F Reference Cigarette**

| Compound Name                                                                       | CAS Number              | Identification Confidence | Aerosol Fraction | Conc. in THS2.2 ( $\mu\text{g}/\text{item}$ ) | Conc. in 3R4F ( $\mu\text{g}/\text{item}$ ) |
|-------------------------------------------------------------------------------------|-------------------------|---------------------------|------------------|-----------------------------------------------|---------------------------------------------|
| Higher molecular weight derivative of Farnesylacetone (C30)                         | -                       | High                      | TPM              | 0.268                                         | 2.13                                        |
| Norcotinine                                                                         | 5980-06-3               | Confirmed                 | TPM              | 0.263                                         | 6.83                                        |
| 3-Hydroxy-4-methylbenzoic acid                                                      | 586-30-1                | High                      | TPM              | 0.260                                         | 2.09                                        |
| 1H-Pyrrole, 1-ethyl-                                                                | 617-92-5                | Confirmed                 | GVP              | 0.258                                         | 0.136                                       |
| Benzene, 2-(1,3-butadienyl)-1,3,5-trimethyl-                                        | 5732-00-3               | Confirmed                 | TPM              | 0.255                                         | 0.472                                       |
| Isofucosterol                                                                       | 481-14-1                | High                      | TPM              | 0.255                                         | 3.24                                        |
| Octadecanoic acid, ethyl ester                                                      | 111-61-5                | Confirmed                 | TPM              | 0.253                                         | < 0.100                                     |
| 1,2-Propadiene                                                                      | 463-49-0                | Confirmed                 | GVP              | 0.249                                         | 19.5                                        |
| Steroid derivative                                                                  | -                       | High                      | TPM              | 0.247                                         | 2.06                                        |
| trans-3-Methyl-2-pentene                                                            | 616-12-6                | Confirmed                 | GVP              | 0.246                                         | 24.7                                        |
| Higher molecular weight derivative of $\alpha$ -Longipinene or $\alpha$ -Neoclovene | -                       | High                      | TPM              | 0.242                                         | 1.71                                        |
| 4-Ethenyl-2,6-dimethoxy-phenol                                                      | 28343-22-8              | Confirmed                 | TPM              | 0.241                                         | 5.75                                        |
| 3-Hexanone                                                                          | 589-38-8                | Confirmed                 | GVP              | 0.240                                         | 1.60                                        |
| N-Acetylanatabine                                                                   | 91565-91-2              | Confirmed                 | TPM              | 0.239                                         | 14.6                                        |
| p-Cresol                                                                            | 106-44-5                | Confirmed                 | TPM              | 0.236                                         | 20.2                                        |
| Formic acid                                                                         | 64-18-6                 | Confirmed                 | TPM              | 0.233                                         | 12.8                                        |
| 2-Ethyl-1-butene                                                                    | 760-21-4                | Confirmed                 | GVP              | 0.233                                         | 5.11                                        |
| Adenine                                                                             | 73-24-5                 | Confirmed                 | TPM              | 0.231                                         | 5.95                                        |
| Caprolactone                                                                        | 502-44-3                | Confirmed                 | TPM              | 0.229                                         | < 0.100                                     |
| 2-Heptanone                                                                         | 110-43-0                | Confirmed                 | GVP              | 0.229                                         | 1.88                                        |
| Octacosane                                                                          | 630-02-4                | Confirmed                 | TPM              | 0.228                                         | 0.954                                       |
| 2-Acetylpyrrole                                                                     | 1072-83-9               | Confirmed                 | TPM              | 0.225                                         | 0.371                                       |
| N-Acetylanabasine                                                                   | 3350-86-5               | Confirmed                 | TPM              | 0.221                                         | 7.26                                        |
| Norfuraneol                                                                         | 19322-27-1              | Confirmed                 | TPM              | 0.219                                         | 0.390                                       |
| 2-Heptanone, 6-methyl-                                                              | 928-68-7                | Confirmed                 | GVP              | 0.215                                         | 0.679                                       |
| Benzoic acid, 2-hydroxy-4-methyl                                                    | 50-85-1                 | Medium                    | TPM              | 0.214                                         | 1.74                                        |
| N-acetyl-4(H)-pyridine                                                              | 67402-83-9              | High                      | TPM              | 0.213                                         | < 0.100                                     |
| Butyl-1H-imidazole                                                                  | 50790-93-7              | Confirmed                 | TPM              | 0.213                                         | 6.18                                        |
| 4-Pentenal                                                                          | 2100-17-6               | Confirmed                 | GVP              | 0.213                                         | 2.95                                        |
| Phenol, 4-ethenyl-                                                                  | 2628-17-3               | Confirmed                 | TPM              | 0.206                                         | 15.0                                        |
| Methylpropionate                                                                    | 554-12-1                | Confirmed                 | GVP              | 0.199                                         | 1.32                                        |
| 2,7,11-Trimethyl-1,6,10-dodecatriene                                                | 502723-87-7             | High                      | TPM              | 0.198                                         | 6.147                                       |
| 2-Acetyl-2-hydroxy-g-butyrolactone                                                  | 135366-64-2             | Confirmed                 | TPM              | 0.197                                         | 0.354                                       |
| Labdanediol                                                                         | 10267-21-7 <sup>†</sup> | High                      | TPM              | 0.196                                         | < 0.100                                     |
| Eicosane                                                                            | 112-95-8                | Confirmed                 | TPM              | 0.194                                         | 0.247                                       |
| 2-Cyclopenten-1-one, 3-ethyl-2-hydroxy-                                             | 21835-01-8              | Confirmed                 | TPM              | 0.194                                         | 1.66                                        |
| Nicotinamide                                                                        | 98-92-0                 | Confirmed                 | TPM              | 0.192                                         | 4.32                                        |
| Dimethyltrisulfide                                                                  | 3658-80-8               | Confirmed                 | GVP              | 0.192                                         | 0.460                                       |
| Hydrogen sulfide                                                                    | 7783-06-4               | Confirmed                 | GVP              | 0.190                                         | 5.04                                        |
| 2,5-Hexanedione                                                                     | 110-13-4                | Confirmed                 | TPM              | 0.190                                         | 0.515                                       |
| 2-Methyl-3-pentanone                                                                | 565-69-5                | Confirmed                 | GVP              | 0.189                                         | 1.21                                        |
| 2,3-Dimethyl-1-butene                                                               | 563-78-0                | Confirmed                 | GVP              | 0.188                                         | 16.9                                        |

<sup>†</sup> CAS number corresponds to one of the isomeric forms for this compound

**Table S1 (continued). The Most Abundant ( $\geq 100$  ng/item) Chemical Constituents Present in the Aerosol of THS2.2 and Their Corresponding Concentrations in the Smoke of the 3R4F Reference Cigarette**

| Compound Name                                                              | CAS Number   | Identification Confidence | Aerosol Fraction | Conc. in THS2.2 ( $\mu\text{g}/\text{item}$ ) | Conc. in 3R4F ( $\mu\text{g}/\text{item}$ ) |
|----------------------------------------------------------------------------|--------------|---------------------------|------------------|-----------------------------------------------|---------------------------------------------|
| Pentadecanal                                                               | 2765-11-9    | Confirmed                 | TPM              | 0.183                                         | 1.49                                        |
| trans-2-Methyl-1,3-pentadiene                                              | 926-54-5     | Confirmed                 | GVP              | 0.182                                         | 19.3                                        |
| 1-(4-Methylphenyl)-ethanone                                                | 122-00-9     | Confirmed                 | TPM              | 0.182                                         | 0.754                                       |
| cis-3-Methyl-2-pentene                                                     | 922-62-3     | Confirmed                 | GVP              | 0.179                                         | 21.2                                        |
| 3'-Hydroxycotinine                                                         | 34834-67-8   | Confirmed                 | TPM              | 0.178                                         | 7.22                                        |
| 4-Vinylguaiacol                                                            | 7786-61-0    | Confirmed                 | TPM              | 0.177                                         | 6.24                                        |
| 2,2,6-Trimethyl-1-(3-methylbuta-1,3-dienyl)-7-oxabicyclo[4.1.0]heptan-3-ol | 1427305-74-5 | Medium                    | TPM              | 0.177                                         | 3.48                                        |
| Maltol                                                                     | 118-71-8     | Confirmed                 | TPM              | 0.175                                         | 0.347                                       |
| 3,4-Dimethyl-2,5-furandione                                                | 766-39-2     | Confirmed                 | TPM              | 0.174                                         | 0.235                                       |
| 3-Methyl-2(5H)-furanone                                                    | 22122-36-7   | Confirmed                 | TPM              | 0.174                                         | 0.295                                       |
| 2H-Pyrrol-2-one, 4-ethyl-1,5-dihydro-3-methyl                              | 766-45-0     | High                      | TPM              | 0.173                                         | 12.4                                        |
| (2-Isopropyl-1,3-dioxolan-4-yl)methanol                                    | 31192-94-6   | High                      | TPM              | 0.171                                         | < 0.100                                     |
| $\alpha$ -Ionol                                                            | 25312-34-9   | Confirmed                 | GVP              | 0.169                                         | < 0.100                                     |
| 10-Heneicosene                                                             | 95008-11-0   | Confirmed                 | TPM              | 0.167                                         | 0.442                                       |
| 2-Methylhydroquinone                                                       | 95-71-6      | Confirmed                 | TPM              | 0.166                                         | 4.86                                        |
| 1-Heptene                                                                  | 592-76-7     | Confirmed                 | GVP              | 0.165                                         | 23.9                                        |
| Isobutyronitrile                                                           | 78-82-0      | Confirmed                 | GVP              | 0.165                                         | 20.9                                        |
| 5-Methyl-2-furanmethanol                                                   | 3857-25-8    | Confirmed                 | TPM              | 0.164                                         | < 0.100                                     |
| 5-Isopropyl-2,4-imidazolidinedione                                         | 16935-34-5   | Confirmed                 | TPM              | 0.163                                         | 8.36                                        |
| Pantolactone                                                               | 79-50-5      | Confirmed                 | TPM              | 0.163                                         | 0.278                                       |
| cis-2,6-Octadiene, 2,6-dimethyl-                                           | 2492-22-0    | Confirmed                 | GVP              | 0.160                                         | 4.44                                        |
| 1-Methylcyclopentene                                                       | 693-89-0     | Confirmed                 | GVP              | 0.160                                         | 19.4                                        |
| Isocrotonic acid                                                           | 503-64-0     | Confirmed                 | TPM              | 0.159                                         | 1.53                                        |
| 2,5-Dihydro-3,5-dimethyl-2-furanone                                        | 5584-69-0    | High                      | TPM              | 0.158                                         | 0.209                                       |
| 9-Eicosyne                                                                 | 71899-38-2   | High                      | TPM              | 0.158                                         | 0.941                                       |
| 2-Methylphenol                                                             | 95-48-7      | Confirmed                 | TPM              | 0.158                                         | 6.73                                        |
| Butyl-hydroxytoluene                                                       | 128-37-0     | Confirmed                 | TPM              | 0.155                                         | < 0.100                                     |
| c-Phytol                                                                   | 854039-21-7  | Confirmed                 | TPM              | 0.154                                         | 0.222                                       |
| 2-Vinyl-5-methylfuran                                                      | 10504-13-9   | Confirmed                 | GVP              | 0.153                                         | 0.330                                       |
| trans-4-Methyl-2-pentene                                                   | 674-76-0     | Confirmed                 | GVP              | 0.151                                         | 7.43                                        |
| cis-3-Hexene                                                               | 7642-09-3    | Confirmed                 | GVP              | 0.150                                         | 5.25                                        |
| Cyclohexene                                                                | 110-83-8     | Confirmed                 | GVP              | 0.149                                         | 7.85                                        |
| Diacetin monopropanoate                                                    | 36600-62-1   | Confirmed                 | TPM              | 0.149                                         | 1.69                                        |
| 1-Docosanol                                                                | 661-19-8     | Confirmed                 | TPM              | 0.149                                         | 0.534                                       |
| 4-Vinylpyridine                                                            | 100-43-6     | Confirmed                 | TPM              | 0.148                                         | 12.7                                        |
| 5-Cyanonicotine                                                            | 42459-12-1   | Confirmed                 | TPM              | 0.146                                         | 59.5                                        |
| Thiophene                                                                  | 110-02-1     | Confirmed                 | GVP              | 0.145                                         | 1.92                                        |
| 4-Vinylcatechol                                                            | 6053-02-7    | Confirmed                 | TPM              | 0.140                                         | 38.3                                        |
| 9-Nonadecene                                                               | 31035-07-1   | High                      | TPM              | 0.137                                         | 2.61                                        |
| 4-Ethylguaiacol                                                            | 2785-89-9    | Confirmed                 | TPM              | 0.137                                         | 0.377                                       |
| cis-Verbenol                                                               | 18881-04-4   | Confirmed                 | TPM              | 0.137                                         | 1.13                                        |
| 1-Hexadecanol                                                              | 36653-82-4   | Confirmed                 | TPM              | 0.136                                         | 0.833                                       |
| 2-Cyclopenten-1-one, dimethyl- (configurational isomer 2)                  | -            | High                      | GVP              | 0.135                                         | 3.02                                        |

**Table S1 (continued). The Most Abundant ( $\geq 100$  ng/item) Chemical Constituents Present in the Aerosol of THS2.2 and Their Corresponding Concentrations in the Smoke of the 3R4F Reference Cigarette**

| Compound Name                                                              | CAS Number  | Identification Confidence | Aerosol Fraction | Conc. in THS2.2 ( $\mu\text{g}/\text{item}$ ) | Conc. in 3R4F ( $\mu\text{g}/\text{item}$ ) |
|----------------------------------------------------------------------------|-------------|---------------------------|------------------|-----------------------------------------------|---------------------------------------------|
| trans-Caryophyllene                                                        | 87-44-5     | Confirmed                 | TPM              | 0.135                                         | 1.22                                        |
| 7-Oxabicyclo[4.1.0]heptan-3-ol, 6-(3-hydroxy-1-butenyl)-1,5,5-trimethyl-)- | 72777-88-9  | Medium                    | TPM              | 0.135                                         | 1.31                                        |
| 1-Methylcyclohexene                                                        | 591-49-1    | Confirmed                 | GVP              | 0.134                                         | 2.78                                        |
| Phenylethyl alcohol                                                        | 60-12-8     | Confirmed                 | TPM              | 0.133                                         | 0.381                                       |
| Chloroethane                                                               | 75-00-3     | Confirmed                 | GVP              | 0.131                                         | 1.06                                        |
| Cyclobutanone                                                              | 1191-95-3   | Confirmed                 | GVP              | 0.130                                         | 3.79                                        |
| Linolenic acid, methyl ester                                               | 301-00-8    | Confirmed                 | TPM              | 0.130                                         | 0.809                                       |
| trans-2-Hexene                                                             | 13269-52-8  | Confirmed                 | GVP              | 0.130                                         | 17.4                                        |
| Butanenitrile, 2-methylene                                                 | 1647-11-6   | Confirmed                 | GVP              | 0.130                                         | 12.3                                        |
| 2,4-Dimethyl pyridine                                                      | 108-47-4    | Confirmed                 | TPM              | 0.129                                         | 4.35                                        |
| 3-Acetoxy pyridine                                                         | 17747-43-2  | Confirmed                 | TPM              | 0.128                                         | 8.17                                        |
| Tridecane, 2,6,10-trimethyl-                                               | 3891-99-4   | High                      | TPM              | 0.126                                         | 1.67                                        |
| 2-Methyl-2-hexene                                                          | 2738-19-4   | Confirmed                 | GVP              | 0.126                                         | 17.6                                        |
| 3,5-Dimethylcyclopentene                                                   | 7459-71-4   | High                      | GVP              | 0.126                                         | 7.18                                        |
| 2-Methylcyclopentanone                                                     | 1120-72-5   | Confirmed                 | GVP              | 0.125                                         | 6.85                                        |
| 3-(4,8,12-Trimethyltridecyl)furan                                          | 54869-11-3  | Confirmed                 | TPM              | 0.125                                         | 0.260                                       |
| N-Nitrosoanatabine                                                         | 887407-16-1 | Confirmed                 | TPM              | 0.125                                         | 0.955                                       |
| 4-Ethylcatechol                                                            | 1124-39-6   | Confirmed                 | TPM              | 0.124                                         | 5.84                                        |
| Hexacosane                                                                 | 630-01-3    | Confirmed                 | TPM              | 0.123                                         | 0.360                                       |
| Bulnesol                                                                   | 22451-73-6  | High                      | TPM              | 0.122                                         | < 0.100                                     |
| Nonane                                                                     | 111-84-2    | Confirmed                 | GVP              | 0.121                                         | 3.34                                        |
| Eicosane, 2-methyl-                                                        | 1560-84-5   | Confirmed                 | TPM              | 0.121                                         | < 0.100                                     |
| 2-Furancarbonitrile                                                        | 617-90-3    | Confirmed                 | GVP              | 0.120                                         | 1.67                                        |
| 2-Methyl-1,4-pentadiene                                                    | 763-30-4    | Confirmed                 | GVP              | 0.119                                         | 9.84                                        |
| 1,2-Cyclohexanedione                                                       | 765-87-7    | Confirmed                 | TPM              | 0.119                                         | < 0.100                                     |
| trans,trans-2,4-Hexadiene                                                  | 5194-51-4   | Confirmed                 | GVP              | 0.119                                         | 16.3                                        |
| 2-Tritriacontanone                                                         | 75207-55-5  | High                      | TPM              | 0.118                                         | 2.00                                        |
| 1,3-Cyclohexadiene                                                         | 592-57-4    | Confirmed                 | GVP              | 0.115                                         | 10.3                                        |
| Dococosanal                                                                | 57402-36-5  | Confirmed                 | TPM              | 0.114                                         | 0.315                                       |
| Sinapyl alcohol                                                            | 537-33-7    | Confirmed                 | TPM              | 0.114                                         | 7.95                                        |
| Squalene oxide                                                             | 7200-26-2   | Confirmed                 | TPM              | 0.113                                         | 1.49                                        |
| Octane, 3,3-dimethyl-                                                      | 4110-44-5   | Confirmed                 | GVP              | 0.111                                         | 0.610                                       |
| N-Furfurylpyrrole                                                          | 1438-94-4   | Confirmed                 | TPM              | 0.108                                         | 0.103                                       |
| 3-Methyltrtriacontane                                                      | 14167-69-2  | High                      | TPM              | 0.108                                         | 0.853                                       |
| Octane                                                                     | 111-65-9    | Confirmed                 | GVP              | 0.108                                         | 6.73                                        |
| o-Cymene                                                                   | 527-84-4    | Confirmed                 | GVP              | 0.106                                         | 0.323                                       |
| 9-Methyladenine                                                            | 700-00-5    | Confirmed                 | TPM              | 0.106                                         | 1.02                                        |
| 2-Methylnonadecane                                                         | 1560-86-7   | Confirmed                 | TPM              | 0.106                                         | < 0.100                                     |
| 2(3H)-Furanone, dihydro-3-hydroxy-4,4-dimethyl-, (R)-                      | 599-04-2    | Confirmed                 | TPM              | 0.105                                         | 0.202                                       |
| Nonadecane                                                                 | 629-92-5    | Confirmed                 | TPM              | 0.105                                         | 0.194                                       |
| 2-Ethylpyridine                                                            | 100-71-0    | Confirmed                 | GVP              | 0.101                                         | 0.276                                       |
| 3-Methylcinnamic acid                                                      | 3029-79-6   | Medium                    | TPM              | 0.101                                         | 4.26                                        |
| 2,5-Dimethyl-3(2H)-furanone                                                | 14400-67-0  | Confirmed                 | TPM              | 0.100                                         | < 0.100                                     |
| Not Identified (GCxGC-TOFMS; 10 compounds)                                 | -           | Not Identified            | TPM              | 7.33                                          | 8.38                                        |
| Not Identified (GCxGC-TOFMS; 3 compounds)                                  | -           | Not Identified            | GVP              | 5.18                                          | 3.70                                        |
